1 **Identification of mutations that cooperate with defects in B cell transcription**  
2 **factors to initiate leukemia**

3

4 Running title: **Cooperating mutations that initiate B cell leukemia**

5

6 Lynn M. Heltemes-Harris<sup>1,2,3</sup>, Gregory K. Hubbard<sup>1,2,3</sup>, Rebecca S. La Rue<sup>4</sup>, Sarah A.  
7 Munro<sup>4</sup>, Todd P. Knudson<sup>4</sup>, Rendong Yang<sup>4,5</sup>, Christine M. Henzler<sup>4</sup>, Timothy K. Starr<sup>2,6</sup>,  
8 Aaron L. Sarver<sup>2</sup>, Steven M. Kornblau<sup>7</sup>, Michael A. Farrar<sup>1,2,3</sup>

9

10 Address correspondence to: M.A.F.: [farra005@umn.edu](mailto:farra005@umn.edu)

11

12 <sup>1</sup>Center for Immunology, University of Minnesota, Minneapolis, MN 55455 USA

13 <sup>2</sup>Masonic Cancer Center, University of Minnesota, Minneapolis, MN 55455 USA

14 <sup>3</sup>Department of Laboratory Medicine and Pathology, University of Minnesota,  
15 Minneapolis, MN 55455 USA

16 <sup>4</sup>Minnesota Supercomputing Institute, University of Minnesota, Minneapolis, MN 55455  
17 USA

18 <sup>5</sup>Current address: The Hormel Institute, University of Minnesota Austin, MN 55912 USA

19 <sup>6</sup>Department of Obstetrics, Gynecology and Women's Health, University of Minnesota,  
20 Minneapolis, MN 55455, USA.

21

22 <sup>7</sup>Department of Leukemia, The University of Texas, M.D. Anderson Cancer Center,  
23 Houston, TX USA

24 **Abstract**

25

26 The transcription factors EBF1 and PAX5 are frequently mutated in B cell acute lymphoblastic  
27 leukemia (B-ALL). We demonstrate that *Pax5*<sup>+/-</sup> x *Ebf1*<sup>+/-</sup> compound heterozygous mice develop  
28 highly penetrant leukemia. Similar results were seen in *Pax5*<sup>+/-</sup> x *Ikzf1*<sup>+/-</sup> and *Ebf1*<sup>+/-</sup> x *Ikzf1*<sup>+/-</sup>  
29 mice for B-ALL, or in *Tcf7*<sup>+/-</sup> x *Ikzf1*<sup>+/-</sup> mice for T cell leukemia. To identify genetic defects that  
30 cooperate with *Pax5* and *Ebf1* compound heterozygosity to initiate leukemia, we performed a  
31 Sleeping Beauty (SB) transposon screen that identified cooperating partners including gain-of-  
32 function mutations in *Stat5* (~65%) and *Jak1* (~68%), or loss-of-function mutations in *Cblb* (61%)  
33 and *Myb* (32%). These findings underscore the role of JAK/STAT5 signaling in B cell  
34 transformation and demonstrate unexpected roles for loss-of-function mutations in *Cblb* and  
35 *Myb* in leukemic transformation. RNA-Seq studies demonstrated upregulation of a  
36 PDK1>SGK3>MYC pathway; treatment of *Pax5*<sup>+/-</sup> x *Ebf1*<sup>+/-</sup> leukemia cells with PDK1 inhibitors  
37 blocked proliferation in vitro. Finally, we identified conserved transcriptional variation in a  
38 subset of genes between human leukemias and our mouse B-ALL models. Thus, compound  
39 haploinsufficiency for B cell transcription factors likely plays a critical role in transformation of  
40 human B cells and suggest that PDK1 inhibitors may be effective for treating patients with such  
41 defects.

42

43

## 44 **Introduction**

45 Heterozygous deletions or loss of function mutations in a number of B cell transcription  
46 factors are a common feature of human B cell acute lymphoblastic leukemia (ALL)[1].  
47 This is clearly evident for three transcription factors - EBF1, PAX5 and IKZF1[1, 2].  
48 Interestingly, alterations involving these transcription factors commonly occur  
49 together[1, 3]. This is particularly pronounced in BCR-ABL<sup>+</sup> leukemia in which 50% of  
50 leukemias with *IKZF1* deletions also have mutations affecting *Pax5* expression or  
51 function[4]. Therefore, an important question is whether compound haploinsufficiency  
52 for these transcription factors drives transformation and which combinations of  
53 transcription factors can promote transformation. Finally, the genetic alterations that  
54 cooperate with haploinsufficiency for these transcription factors to drive transformation  
55 have also not been comprehensively elucidated.

56

57 To address the questions above, we generated a set of mice that exhibited compound  
58 haploinsufficiency for various combinations of *Ebf1*, *Pax5*, *Ikzf1*, *Cebpa*, and *Tcf7*.  
59 Herein, we demonstrate that *Pax5*<sup>+/-</sup> x *Ebf1*<sup>+/-</sup>, *Pax5*<sup>+/-</sup> x *Ikzf1*<sup>+/-</sup>, and *Ebf1*<sup>+/-</sup> x *Ikzf1*<sup>+/-</sup> mice  
60 all generated B cell leukemia, while *Tcf7*<sup>+/-</sup> x *Ikzf1*<sup>+/-</sup> mice generated T cell leukemia.  
61 Furthermore, we used a SB Transposon screen to identify mutations that cooperate with  
62 *Pax5*<sup>+/-</sup> x *Ebf1*<sup>+/-</sup> compound haploinsufficiency to promote transformation. Our findings  
63 document the key role that compound haploinsufficiency for critical transcription factors  
64 plays in leukemia transformation and identify mutations that cooperate with such  
65 alterations to initiate transformation.

66

## 67 **MATERIALS AND METHODS**

### 68 **Mice and Cells**

69 All mice have been previously described [5-10]; the University of Minnesota IACUC  
70 approved all animal experiments. Mice were monitored for up to 400 days for leukemia.  
71 Spleen, lymph nodes, and bone marrow were isolated from tumor-bearing mice and  
72 used for further experiments.

73

### 74 **RNA-Seq Analysis**

75 RNA-seq was performed on total RNA extracted from either column purified progenitor  
76 B control cells (C57Bl/6, *Pax5*<sup>+/-</sup>*x Ebf1*<sup>+/-</sup>, *Pax5*<sup>+/-</sup> or *Ebf1*<sup>+/-</sup>) or leukemic cells from lymph  
77 nodes of tumor-bearing mice using a RNeasy Plus kit (Qiagen). Fifty-three barcoded  
78 TruSeq RNA v2 libraries were created and sequenced on a HiSeq 2500. A second set  
79 of data were used for variant calling analysis. Eight barcoded libraries were sequenced  
80 on the HiSeq 2000 to produce 100 bp paired end reads.

### 81 **Systematic identification of gene clusters**

82 Phase\_2 BCCA and St Jude (2016) and phase\_3 St Jude ALL(2018) Human mRNA  
83 RNA-Seq data were downloaded from [https://ocg.cancer.gov/programs/target/data-](https://ocg.cancer.gov/programs/target/data-matrix)  
84 matrix on April 23 2019 (dbGaP accession phs000218.v22.p8). The Value of 0.1 was  
85 added to each value the data was mean centered and log transformed. A SD cutoff was  
86 used to identify ~8500 genes in each of three datasets. Unsupervised hierarchical  
87 clustering was used to define sets of genes which were defined by average linkage  
88 correlation > 0.2 and more than 150 members. Statistical enriched Gene cluster

89 memberships across clusters were defined by Fisher exact test to identify “common”  
90 clusters across datasets. For the mouse data, the tumors were treated in a similar  
91 fashion except an SD cutoff of 1.0 was used. Statistical enriched gene cluster  
92 memberships across clusters were defined by Fisher exact test to identify “common”  
93 clusters across datasets using gene name matching.

94

### 95 **Data Analysis**

96 Data was analyzed using Prism 8 (Graphpad). A Shapiro-Wilk test was used to  
97 determine normality of all data. Unpaired data that passed normality was analyzed by  
98 an ordinary one-way ANOVA with Holm-Sidak’s multiple comparison test or by an  
99 unpaired t-test; data that failed normality were analyzed using an unpaired Kruskal-  
100 Wallace test with Dunn’s multiple comparison test. Kaplan-Meier Survival curves were  
101 analyzed by Log-rank (Mantel-Cox) Test. Integrated Genomics Viewer was used to  
102 view aligned sequences (Broad Institute).

103

### 104 **Accession Numbers**

105 RNA-Seq data was deposited with GEO and is accessible through GEO Series  
106 accession number GSE148680  
107 (<https://www.ncbi.nlm.nih.gov/geo/query/acc.cgi?acc=GSE148680>).

108

### 109 **Supplemental methods**

110 Supplemental Methods section includes detailed protocols of cell lines and culture  
111 conditions, NGS, flow cytometry, qPCR, western blotting, Gene Set Enrichment

112 Analysis, SB Mutagenesis, Transposon Insertion Analysis, Reverse Phase Proteomics  
113 and Inhibitor Assay.

114 **RESULTS**

115

116 **Reduced expression of transcription factors critical for lymphocyte development**  
117 **leads to leukemia**

118 To explore whether compound haploinsufficiency for *Ebf1* and *Pax5* leads to B cell  
119 transformation, we generated *Pax5*<sup>+/-</sup> x *Ebf1*<sup>+/-</sup> mice. As shown in Figure 1A, ~67% of  
120 *Pax5*<sup>+/-</sup> x *Ebf1*<sup>+/-</sup> mice develop leukemia with a mean survival of 296 days. Flow  
121 cytometry analysis from bone marrow, lymph nodes and spleens of these mice  
122 demonstrated that leukemias resemble progenitor-B cells with a B220<sup>+</sup>CD19<sup>+</sup>IgM<sup>-</sup>  
123 phenotype (Fig. 1B) and also express pre-BCR, CD43, IL7R, TSLPR, c-KIT, AA4.1 and  
124 CD25 confirming their progenitor-B cell like phenotype (Sup Fig. 1). Although both male  
125 and female mice developed leukemia in this model, female mice exhibited greater  
126 penetrance (97% versus 71% at 400 days) and reduced median survival (265 days vs  
127 298 days, p= 0.005; Sup Fig. 2). The effect of reduced expression of *Pax5* and *Ebf1* on  
128 transformation was not limited to this combination of transcription factors as similar  
129 results were observed in *Pax5*<sup>+/-</sup> x *Ikzf1*<sup>+/-</sup> and *Ebf1*<sup>+/-</sup> x *Ikzf1*<sup>+/-</sup> mice (Fig. 1A).  
130 Compound haploinsufficiency for all three transcription factors (*Pax5*<sup>+/-</sup> x *Ebf1*<sup>+/-</sup> x *Ikzf1*<sup>+/-</sup>  
131 mice) resulted in 100% penetrance of leukemia and much shorter mean survival (202  
132 days). We previously reported that *Pax5*<sup>+/-</sup> or *Ebf1*<sup>+/-</sup> mice do not develop leukemia[11].  
133 In contrast, *Ikzf1*<sup>+/-</sup> mice do develop leukemia with low penetrance (Fig. 1A)[12, 13];  
134 however, these were always T cell leukemias (Fig. 1C). Deleting one copy of *Pax5* and  
135 *Ebf1* not only increased the frequency of B cell leukemias in *Ikzf1*<sup>+/-</sup> mice (none to  
136 ~40%), but surprisingly, also resulted in a dramatic increase in T cell leukemias (~5% in

137 *Ikzf1*<sup>+/-</sup> mice versus ~35% in *Pax5*<sup>+/-</sup> *x* *Ebf1*<sup>+/-</sup> *x* *Ikzf1*<sup>+/-</sup> mice)(Fig. 1C,D). Thus, although  
138 PAX5 and EBF1 are only expressed in B cells, reduced expression of these two  
139 transcription factors paradoxically also promoted T cell leukemia.

140

141 We next examined whether compound haploinsufficiency for lineage determining  
142 transcription factors was a general mechanism that could promote transformation of  
143 multiple cell lineages. To this end, we generated *Tcf7*<sup>+/-</sup> *x* *Ikzf1*<sup>+/-</sup> mice, as *Tcf7*, which  
144 encodes TCF1, and *Ikzf1*, are both required for T cell development[8, 9]. In addition, we  
145 generated *Cebpa*<sup>+/-</sup> *x* *Ikzf1*<sup>+/-</sup> mice, as *Cebpa* and *Ikzf1* are both involved in myeloid cell  
146 development[14]. *Cebpa*<sup>+/-</sup> *x* *Ikzf1*<sup>+/-</sup> mice did not develop myeloid leukemia and the  
147 rate of T cell leukemia in *Cebpa*<sup>+/-</sup> *x* *Ikzf1*<sup>+/-</sup> mice was no higher than that observed for  
148 *Ikzf1*<sup>+/-</sup> mice. Thus, not all combinations of transcription factor haploinsufficiency  
149 promote transformation. However, *Tcf7*<sup>+/-</sup> *x* *Ikzf1*<sup>+/-</sup> mice developed T cell leukemias  
150 with high penetrance, comparable to that seen for B cell leukemias in *Pax5*<sup>+/-</sup> *x* *Ebf1*<sup>+/-</sup>  
151 mice (Fig. 1A,C). Thus, compound haploinsufficiency for lineage defining transcription  
152 factors can promote transformation in multiple cell lineages and may underlie many  
153 types of leukemias.

154

### 155 **Genetic mutations that cooperate with Pax5 and Ebf1 heterozygosity to induce** 156 **leukemia**

157 Previous reports by Prasad and colleagues suggested that *Ebf1*<sup>+/-</sup> mice have defects in  
158 DNA repair with decreased expression of *Rad51* and increased  $\gamma$ H2AX foci[15]. These  
159 studies further claimed that defects in DNA repair resulted in increased mutation rates in



160 *Pax5*<sup>+/-</sup> x *Ebf1*<sup>+/-</sup> leukemias and that this accounts, in part, for progenitor B cell  
161 transformation in those mice[15]. This suggestion is difficult to reconcile with the  
162 relatively low frequency of somatic mutations reported in human in B-ALL[16]. We re-  
163 examined this issue using *Ebf1*<sup>+/-</sup> mice in our colony. In contrast to the previous study,  
164 we found no difference in *Rad51*, *Rad51AP* or  $\gamma$ H2AX expression when examining log2  
165 transformed FPKM values generated from two separate RNA-seq experiments (Sup.  
166 Fig. 3A). In fact, the low level of variation paralleled that observed for a panel of  
167 housekeeping genes (*B2m*, *Hprt*, and *Actb*; Sup. Fig. 3A). Since the previous studies  
168 compared progenitor-B cells from WT and *Ebf1*<sup>+/-</sup> mice that had been cultured  
169 extensively in vitro we examined  $\gamma$ H2AX expression in long-term cultured progenitor-B  
170 cells from WT and *Ebf1*<sup>+/-</sup> mice; no significant difference was observed (Sup. Fig. 3B).  
171 Further, we examined  $\gamma$ H2AX expression by flow cytometry in progenitor-B cells directly  
172 from the bone marrow of WT and *Ebf1*<sup>+/-</sup> mice. Again, we found no significant difference  
173 in expression (Sup. Fig. 3C). Next, we examined whether genes involved in DNA  
174 repair were enriched in *Ebf1*<sup>+/-</sup> cells by Gene Set Enrichment Analysis (GSEA) using our  
175 RNA-seq data. We saw a significant enrichment for DNA repair genes (Sup. Fig. 3D),  
176 although it is unclear whether this reflects a direct effect of EBF1 on genes involved in  
177 DNA repair or just a relative increase in cells stuck at a stage undergoing VDJ  
178 recombination, as there is significant overlap between genes involved in DNA damage  
179 response and VDJ recombination. Finally, we examined whether subsets of human B  
180 cell leukemias exhibited increased mutation rates and if so, whether they were enriched  
181 in those containing *Ebf1* mutations. As shown in figure 2A, ~16% of B-ALLs obtained  
182 from the NIH TARGET ALL database showed significant levels of missense mutations.

183 We broke the total B-ALL samples down into smaller subsets, characterized by *ETV6-*  
184 *RUNX1* or *TCF3-PBX1* translocations, or those with missense mutations in *CDKN2A*,  
185 *PAX5*, *EBF1* or *IKZF1*. Leukemias expressing the *ETV6-RUNX1* or *TCF3-PBX1*  
186 translocations, or *PAX5* missense mutations, were not enriched in hypermutated  
187 leukemias (Fig. 2B,C). In contrast, leukemias with missense mutations in *CDKN2A*,  
188 *EBF1* or *IKZF1* showed an increased percentage of leukemias with high numbers of  
189 missense mutations (Fig.2B). The number of *CDKN2A*, *EBF1*, or *IKZF1* samples was  
190 too small to assess whether the increased percentage of hypermutated leukemias was  
191 statistically significant. However, mutations in *EBF1*, *IKZF1* and *CDKN2A* are all  
192 enriched in *BCR-ABL*-like leukemias and when we pooled samples with these three  
193 mutations together there was a clear enrichment in samples with high numbers of  
194 missense mutations (Fig. 2C). In conclusion, leukemias with *EBF1* mutations may be  
195 preferentially found in hypermutated B-ALL, but this is not a feature restricted to *EBF1*  
196 as mutations in *CDKN2A* and *IKZF1* are also associated with this hypermutated  
197 phenotype.

198  
199 To discover novel genes that cooperate with *Pax5* and *Ebf1* heterozygosity to induce B-  
200 ALL we employed a Sleeping Beauty (SB) transposon mutagenesis screen[17]. *Pax5*<sup>+/-</sup>  
201 *x Ebf1*<sup>+/-</sup> *x Cd79a-cre* mice were crossed to mice expressing the mutagenic transposon  
202 SB in a *Cd79a-Cre*-dependent, and hence B cell-specific, manner. We generated 34  
203 mice that were heterozygous for both *Ebf1* and *Pax5* and expressed the mutagenic  
204 transposon. Mice were housed for up to 400 days to allow them to develop leukemia.  
205 We also included single heterozygous combinations (*Pax5*<sup>+/-</sup> *x Cd79a-Cre* *x SB* and

206 *Ebf1*<sup>+/-</sup> x *Cd79a-Cre* x *SB*) but neither of these cohorts developed leukemia within 400  
207 days (data not shown). As seen in figure 3A, all of *Pax5*<sup>+/-</sup> x *Ebf1*<sup>+/-</sup> x *Cd79a-Cre* x *SB*  
208 mice developed leukemia. Thus, the presence of the sleeping beauty transposon  
209 increased penetrance of leukemia from 67% to 100% and decreased the median age of  
210 death from 296 to 205 days. Thus, other genes mobilized or silenced by SB  
211 transposition clearly cooperate with *Pax5* and *Ebf1* heterozygosity to initiate  
212 transformation.

213

214 To identify which genes were targeted by the transposon, we performed RNA-seq  
215 analysis on 31 SB induced leukemias. The SB transposon contains a unique 5' leader  
216 sequence with a splice donor site that allows for splicing into transcripts. In addition, the  
217 SB transposon also has a splice acceptor and SV40 polyA tail that allows for splicing of  
218 upstream exons to the SV40 poly A sequence, thereby allowing for premature  
219 termination. These unique 5' SB sequences and 3' SV40 polyA signal sequences can  
220 be identified by RNA-Seq as novel fusion proteins. This allowed us to map SB fusions  
221 and determine how transposon insertions altered specific gene expression[18]. We  
222 carried out RNA-Seq analysis on progenitor B cells (CD19<sup>+</sup>B220<sup>+</sup>Igκ/λ<sup>-</sup>) from WT,  
223 *Ebf1*<sup>+/-</sup>, *Pax5*<sup>+/-</sup>, and *Pax5*<sup>+/-</sup> x *Ebf1*<sup>+/-</sup> pre-leukemic mice (~6-12 weeks of age), as well  
224 as spontaneous *Pax5*<sup>+/-</sup> x *Ebf1*<sup>+/-</sup> leukemias (Fig. 3B). Differential gene expression  
225 analysis showed that WT and pre-leukemic samples all clustered distinctly from the SB-  
226 induced and spontaneous leukemias. The spontaneous *Pax5*<sup>+/-</sup> x *Ebf1*<sup>+/-</sup> leukemias  
227 were interspersed among the SB-induced leukemias demonstrating that the SB-induced  
228 leukemias shared gene expression signatures with the spontaneous leukemias. Finally,

229 the leukemias were clearly heterogenous with a number of distinct subsets harboring  
230 distinct gene signatures (Fig. 3C).

231

232 **RNA fusion analysis defines genes that cooperate with *Pax5* x *Ebf1***

233 **heterozygosity to induce leukemia.**

234 To identify the targets of transposon mutagenesis, we performed an RNA-Seq-based  
235 analysis of transposon fusions to identify genes targeted in our screen. The fusion  
236 transcripts are detected either directly as unique gene fusions or can be imputed from  
237 paired end reads that have one end derived from SB and the second end derived from  
238 the target gene sequence (called bridging fusions)[18]. There were 758 unique gene  
239 fusions or bridging fusions that were used to identify recurrent fusion events in 27 of 31  
240 leukemias. Figure 3D lists all the reoccurring RNA fusions identified in our screen.  
241 Consistent with the heterogeneity of the gene expression profiles in distinct B-ALL  
242 subsets (Fig 3C), many of the targeted genes were only found in a fraction of the  
243 leukemias (Fig. 3E). The most notable exception was that almost all leukemias had SB  
244 insertions involving either *Jak1* or *Stat5b* (Fig. 3E). SB RNA fusion analysis  
245 demonstrated that the SB 5' leader UTR sequence typically fused to the first 1-4 coding  
246 exons of *Stat5b* or *Jak1* genes (Fig. 4A, Sup. 4A). This suggested that a full-length or  
247 nearly full-length coding transcript would be generated for both *Jak1* and *Stat5b*. *Stat5b*  
248 mRNA was expressed at significantly higher levels in leukemic samples harboring a SB  
249 transposon insertion (Fig. 4B,C). Consistent with data for *Stat5b* mRNA, there was a  
250 clear increase in the expression of STAT5 protein in samples with an SB insertion in the  
251 *Stat5b* gene (Fig. 4D-E). In contrast, the spontaneous *Pax5*<sup>+/-</sup> x *Ebf1*<sup>+/-</sup> leukemias did

252 not exhibit significant increases in *Stat5b* expression (Fig. 4B,C). However, when we  
253 examined levels of phosphorylated STAT5 we found that *Pax5*<sup>+/-</sup> x *Ebf1*<sup>+/-</sup> leukemic cells  
254 expressed significantly higher levels of activated STAT5 than WT control mice, either  
255 directly ex vivo (Fig. 4F), or following in vitro stimulation with IL7 (Fig. 4G). This change  
256 represents a significant increase in phospho-STAT5 (p-STAT5) as it was equal to or  
257 higher than seen in mice expressing a constitutively active form of STAT5b in progenitor  
258 B cells (Fig. 4F,G)[19]. This result illustrated that there were increased levels of pStat5  
259 expression in our leukemic cells. We next looked at known targets of STAT5b - *Cish*  
260 and *Socs2* - to determine if there is increased *Stat5b* activity in these leukemias. We  
261 saw increased expression of both *Cish* and *Socs2* in leukemic cells from both *Pax5*<sup>+/-</sup> x  
262 *Ebf1*<sup>+/-</sup> and *Pax5*<sup>+/-</sup> x *Ebf1*<sup>+/-</sup> x *Cd79a-Cre* x *SB* leukemias, which suggests that pStat5 is  
263 active in the leukemic cells (Fig. 4H, I). Similar expression results were seen for *Jak1*.  
264 We detected a significant increase in *Jak1* mRNA in mice harboring insertions in the  
265 *Jak1* locus (Sup. Fig. 4B,C). This increase in *Jak1* transcription significantly increased  
266 expression of JAK1 protein in leukemic samples with an SB transposon insertion in the  
267 *Jak1* gene locus (Sup. Fig. 4D,E). Our findings are consistent with the high rate of  
268 STAT5 activation observed in both human and murine B-ALL[11, 20] and underscore  
269 the critical role of JAK/STAT5 signaling in B cell leukemia – particularly those with  
270 reduced expression of *Pax5* and *Ebf1*.

271

272 **Loss of *Cblb* cooperates with reduced expression of *Pax5* and *Ebf1* to more**  
273 **rapidly induce leukemia**

274 The other top hit in our mutagenesis screen was *Cblb*, which was targeted in almost 2/3  
275 of our leukemias. Transposon insertional analysis from RNA-seq suggested that *Cblb*  
276 expression would be reduced as the majority of the SB gene fusions detected involved  
277 splicing in exons 6-9 (Fig. 5A). Consistent with this idea, both spontaneous *Pax5*<sup>+/-</sup> x  
278 *Ebf1*<sup>+/-</sup> leukemias, and SB-induced *Pax5*<sup>+/-</sup> x *Ebf1*<sup>+/-</sup> leukemias with an SB insertion in  
279 *Cblb*, showed significantly reduced *Cblb* mRNA expression (4.6-fold) compared to WT  
280 controls (Fig. 5B). Similar results were seen for CBLB protein expression as SB-induced  
281 leukemias with an SB insertion in the *Cblb* gene exhibited significantly lower expression  
282 of CBLB protein (1.8-fold) than SB-induced leukemias without an insert (Fig. 5C,D). To  
283 determine the role of reduced *Cblb* expression in leukemic transformation, we crossed  
284 our *Pax5*<sup>+/-</sup> x *Ebf1*<sup>+/-</sup> mice to *Cblb*<sup>-/-</sup> mice. *Pax5*<sup>+/-</sup> x *Ebf1*<sup>+/-</sup> x *Cblb*<sup>-/-</sup> mice developed B-  
285 ALL and died significantly faster than *Pax5*<sup>+/-</sup> x *Ebf1*<sup>+/-</sup> mice, demonstrating that *Cblb*  
286 acts as a tumor suppressor in progenitor B cells (Fig. 5E).

287

288 **Reduced levels of *Myb* cooperate with *Pax5* and *Ebf1* heterozygosity to more**  
289 **rapidly induce leukemia**

290 *Myb* was another frequent target of our mutagenesis screen. SB transposon insertions  
291 were scattered throughout the *Myb* gene locus, suggesting that this would result in  
292 decreased expression of *Myb* (Fig. 6A). Spontaneous *Pax5*<sup>+/-</sup> x *Ebf1*<sup>+/-</sup> leukemias  
293 showed a clear trend towards reduced *Myb* expression. Consistent with this  
294 observation, in SB-induced *Pax5*<sup>+/-</sup> x *Ebf1*<sup>+/-</sup> leukemias we saw a decrease in *Myb*  
295 expression in leukemias that lacked an SB insertion in *Myb* (1.5-fold, Fig. 6B) and an  
296 additional significant decrease in leukemias with an SB insertion in the *Myb* (2.3-fold,

297 Fig. 6C). Thus, downregulation of *Myb* appears to be a general feature of *Pax5<sup>+/-</sup>x*  
298 *Ebf1<sup>+/-</sup>* leukemias. In SB-induced *Pax5<sup>+/-</sup> x Ebf1<sup>+/-</sup>* leukemias with insertions in the *Myb*  
299 gene, there was also a significant reduction (2.8 fold, Fig. 6D, E) at the protein level.  
300 Importantly, we found that *Myb* expression as assessed by RNA-Seq correlated with  
301 age of death - leukemias with less *Myb* were more aggressive resulting in earlier  
302 lethality (Fig. 6F).

303

### 304 **PDK1-signaling pathway is deregulated in *Pax5<sup>+/-</sup> x Ebf1<sup>+/-</sup>* leukemias**

305 In addition, to gene alterations directly regulated by SB transposition, we also noted a  
306 number of genes whose expression was significantly altered in *Pax5<sup>+/-</sup> x Ebf1<sup>+/-</sup>*  
307 leukemias relative to non-transformed controls. These included genes such as the  
308 tumor suppressor *Bach2*, which was significantly reduced (Sup. Fig. 5A). Intriguingly,  
309 we also noted dramatic (5.7 fold) downregulation of Asparagine synthetase in these  
310 leukemias, which may explain their susceptibility to L-Asparaginase[21](Sup. Fig. 5B).  
311 Other genes were strikingly upregulated including *Pdk1* (3.0-fold) and its downstream  
312 targets *Sgk3*, and *Rheb1* (Fig. 7A,B,C). Conversely *Tsc2*, which inhibits this pathway,  
313 was downregulated (Sup. Fig. 5C,D); this pathway has been previously shown to  
314 enhance mTORC1 function and ultimately MYC expression[22, 23]. To determine  
315 whether PDK1 plays a critical role in maintaining viability of *Pax5<sup>+/-</sup> x Ebf1<sup>+/-</sup>* leukemias,  
316 we treated two cell lines generated from *Pax5<sup>+/-</sup> x Ebf1<sup>+/-</sup>* leukemias in vitro with either  
317 vehicle control or the PDK1 inhibitor (GSK2334750). Treatment of these cell lines with  
318 the PDK1 inhibitor resulted in a dose-dependent decrease in the survival of these cell

319 lines suggesting that this might be a useful treatment for B-ALL subsets with reduced  
320 *Pax5* and *Ebf1* expression (Fig. 7D).

321

322 To examine a possible role for PDK1 expression in human ALL, we examined ALL  
323 patient samples using a reverse phase proteomics approach[24]. PDK1 was expressed  
324 in five subsets of B-ALL but expression varied widely (Sup. Fig. 5E). We examined  
325 PDK1 expression in the two largest cohorts B-NOS and BCR-ABL+ leukemias. PDK1  
326 levels did not correlate with overall survival in B-NOS patients (data not shown). In  
327 contrast, BCR-ABL+ patients with the highest levels of PDK1 expression did  
328 significantly better than those with lower PDK1 expression (Fig. 7E). The difference in  
329 overall survival appears to be driven most strongly by young adults, as they showed the  
330 most dramatic difference in overall survival (Fig. 7F). Finally, we examined PDK1  
331 expression in patients with BCR-ABL and B-NOS leukemia based on relapse status. In  
332 both subsets of leukemia, lower levels of PDK1 correlated with relapse (Fig. 7G,H).  
333 Thus, PDK1 appears to play an important role in B-ALL survival or proliferation, but  
334 patients with the highest level of PDK1 expression respond better to therapy.

335

336 **Pax5 x Ebf1 leukemia show common transcriptional variation patterns across**  
337 **mouse and human**

338 To determine if the murine leukemias that developed in our sleeping beauty screen are  
339 similar to subsets of human B-ALL, we quantified inter-leukemia transcriptional variation  
340 using our newly developed gene cluster expression summary score (GCESS)[25].

341 Using this approach, we first examined inter-leukemia transcriptional variation in distinct



342 human leukemia datasets. There was notable heterogeneity between human B-ALL  
343 subsets. However, we could identify clusters with similar variations in gene expression  
344 (Fig. 8A). We used the GCESS approach to establish transcriptional similarity between  
345 these human leukemias and our murine sleeping beauty transposon induced leukemias.  
346 As shown in figure 8B, there were two distinct transcriptional variants in our SB dataset.  
347 One of these SB leukemia subsets showed a similar gene expression signature to one  
348 of the conserved human leukemia subsets (fishers exact test,  $p=4.3e-07$ ). Thus, the  
349 leukemias that developed in our SB system are similar to human leukemias, thereby  
350 validating our approach as a useful model of human leukemia.

351  
352 To better characterize these leukemias, we utilized ENRICH to examine gene lists  
353 from the GCESS of each of the datasets from the conserved murine and human  
354 leukemias (Sup. Table 1)[26, 27]. Consistent with other findings in this study, we found  
355 upregulation of cytokines and cytokine receptor genes, as well as genes involved in  
356 JAK/STAT5 signaling. In addition, NF $\kappa$ B signaling was significantly altered, which is  
357 consistent with work from multiple groups on NF $\kappa$ B in B cell development and leukemia  
358 [20, 28, 29]. A surprising observation was a strong myeloid gene signature in the human  
359 and murine leukemias. There are two potential reasons for this. First, these leukemias  
360 could be infiltrated with myeloid cells. Alternatively, the leukemias could have lost  
361 lineage fidelity and begun to express myeloid genes. Since PAX5, EBF1 and IKZF1 all  
362 play key roles in enforcing B cell lineage fidelity, and our murine B cell leukemias were  
363 relatively pure populations of leukemic blasts, we favor this later possibility. Thus,  
364 subsets of *Pax5*<sup>+/-</sup> x *Ebf1*<sup>+/-</sup> leukemia exhibit some myeloid characteristics.

365

## 366 **Discussion**

367 Genes encoding the transcription factors *PAX5*, *EBF1* and *IKZF1* frequently exhibit loss  
368 of one allele or express loss-of-function mutations in human B cell leukemia[2, 4, 30].

369 However, their role in B cell transformation is not entirely clear. It is likely that loss of  
370 function mutations in these transcription factors affect B cell differentiation. Previous

371 studies using inducible *Pax5* mutants in murine models of B cell leukemia suggest that  
372 this plays a role[31]. However, *Pax5*<sup>+/-</sup> and *Ebf1*<sup>+/-</sup> mice do not develop leukemia, while

373 *Ikzf1*<sup>+/-</sup> mice have only been shown to develop T cell leukemia. This raises the question  
374 of how mutations in these genes promote transformation. We previously demonstrated

375 that combining loss of one allele of either *Pax5* or *Ebf1* with a constitutively active *Stat5*  
376 transgene (referred to as *Stat5b-CA*) led to rapid onset of B cell leukemia. A key

377 feature of these leukemias is that *Ebf1* expression was reduced ~50% in *Stat5b-CA* x  
378 *Pax5*<sup>+/-</sup> leukemias, while *Pax5* expression was comparably reduced in *Stat5b-CA* x

379 *Ebf1*<sup>+/-</sup> leukemias[11]. These findings suggested that perhaps compound

380 haploinsufficiency for these transcription factors might be key for promoting

381 transformation. Herein we demonstrated that this is the case as *Pax5*<sup>+/-</sup> x *Ebf1*<sup>+/-</sup> mice

382 develop B cell leukemia with high penetrance. Importantly, this was not a phenomenon

383 restricted to this pair of transcription factors as we saw qualitatively similar onset of B

384 cell leukemia in *Pax5*<sup>+/-</sup> x *Ikzf1*<sup>+/-</sup> and *Ebf1*<sup>+/-</sup> x *Ikzf1*<sup>+/-</sup> mice. Nor was this observation

385 restricted to B cell leukemia as we observed that *Tcf7*<sup>+/-</sup> x *Ikzf1*<sup>+/-</sup> mice gave rise to

386 highly penetrant T cell leukemia. Thus, compound haploinsufficiency for transcription

387 factors that play key roles in either B cell or T cell development can promote  
388 transformation.

389

390 The mechanism by which compound haploinsufficiency promotes transformation  
391 remains unclear. Previous studies suggested that this may be due to defective DNA  
392 repair upon reduced *Ebf1* expression. We were unable to validate defects in *Rad51*,  
393 *Rad51ap* expression or increased  $\gamma$ H2AX expression in pre-B cells from *Ebf1*<sup>+/-</sup> mice.  
394 However, we did observe that a subset of human leukemias expressed a hypermutated  
395 phenotype and that leukemias with *CDKN2A*, *EBF1* and *IKZF1* missense mutations  
396 were enriched in this subset. It is possible that the newly described BCR-ABL-like  
397 subset of B-ALL (which is enriched in leukemias with mutations in *CDKN2A*, *IKZF1* and  
398 *EBF1*) might be characterized by the hypermutated phenotype. This should be  
399 examined further and if confirmed suggests that these leukemias may be more  
400 susceptible to immunotherapy-based treatments.

401

402 An alternative mechanism by which compound haploinsufficiency promotes  
403 transformation could involve loss of lineage fidelity. Consistent with this hypothesis,  
404 *EBF1* and *PAX5* have both been shown to play important roles in restricting cells to the  
405 B cell lineage. Consistent with this observation, B cell progenitors in *Pax5*<sup>+/-</sup> *x* *Ebf1*<sup>+/-</sup>  
406 mice retain T cell lineage potential[32]. Moreover, we found that compound  
407 haploinsufficiency for *Pax5* and *Ebf1* promotes increased penetrance of B cell and T cell  
408 leukemia on an *Ikzf1*<sup>+/-</sup> background. Thus, decreased expression of transcription factors  
409 that are only expressed in B cells (*PAX5* and *EBF1*) paradoxically enhance the

410 development of T cell leukemia in *Ikzf1*<sup>+/-</sup> mice. Although the mechanism remains  
411 unclear, it is possible that in some cases T-ALL may emerge from a B cell progenitor.  
412 This may have implications for how such leukemias develop resistance to therapy if the  
413 key progenitor is more closely linked to B cell rather than T cell development. Finally,  
414 our finding that a subset of murine *Pax5*<sup>+/-</sup> x *Ebf1*<sup>+/-</sup> leukemias, as well as their similar  
415 human B-ALL counterparts, exhibit a strong myeloid gene signature also suggests that  
416 loss of lineage fidelity may be a key feature of this disease. Alternatively, the myeloid  
417 signature could arise due to preferential infiltration of this type of leukemia with myeloid  
418 cells. This is certainly a possibility, especially for leukemias in the human datasets.  
419 However, our murine leukemias are strongly enriched for B lineage cells. Thus, we  
420 favor an explanation in which the myeloid gene signature arises due to aberrant  
421 expression of myeloid genes in B cell leukemic blasts.

422

423 To gain a better understanding of the molecular alterations that cooperate with *Pax5*  
424 and *Ebf1* haploinsufficiency to promote transformation we carried out an unbiased SB  
425 transposon screen in *Pax5*<sup>+/-</sup> x *Ebf1*<sup>+/-</sup> mice. These studies identified two major  
426 pathways that cooperate with *Pax5* and *Ebf1* haploinsufficiency to drive transformation.  
427 First, we found gain-of-function mutations for *Jak1* or *Stat5b* in almost all of our  
428 leukemias in this screen. This finding underscores in an unbiased way the critical role  
429 of JAK/STAT5 signaling in B cell transformation. In a previous SB mutagenesis study  
430 targeting the STAT5 pathway, we were able to induce more rapid leukemia onset than  
431 SB mice with only *Pax5*<sup>+/-</sup> x *Ebf1*<sup>+/-</sup> predisposing mutations (average onset of leukemia  
432 ~72 versus 302 days, respectively) [33]. This suggests that changes needed to activate

433 STAT5 may take longer to arise than secondary loss-of-function mutations to *Pax5*,  
434 *Ebf1*, or other transcription factors.

435

436 The second major pathway identified involves CBL-B, and to a much lesser extent the  
437 related family member CBL. The mechanism by which *Cblb* loss-of-function affects  
438 transformation is unclear. However, the fact that these are loss-of-function mutations is  
439 supported by the observation that crossing *Cblb*-deficiency onto the *Pax5*<sup>+/-</sup> x *Ebf1*<sup>+/-</sup>  
440 background accelerated the onset of leukemia and increased overall penetrance. Our  
441 SB screen suggest that *CBLB* mutations should be examined in greater detail in human  
442 B-ALL.

443

444 A number of other target genes were identified in our SB screen, although none were as  
445 prevalent as the mutations in *Jak1*, *Stat5b* or *Cblb*. These include SB insertions in  
446 several cytokine/receptor genes that have previously been shown to be involved in  
447 transformation including *Il2rb*, *Gh*, *Csf2*, as well as the histone acetyltransferase *Ep300*.  
448 Finally, we noted relatively frequent mutations in the transcription factor *Myb*. The  
449 finding that *Myb* was targeted by SB in our leukemias was initially not surprising as *Myb*  
450 has previously been identified as an oncogene. However, what was surprising is that  
451 the mutations in *Myb* were loss-of-function mutations resulting in reduced *Myb*  
452 expression. This leads to the somewhat surprising observation that *Myb* acts  
453 operationally as a tumor suppressor in this context and parallels our previous  
454 observation that NFκB also acts as a functional tumor suppressor in progenitor B

455 cells[20, 34]. Since MYB plays a role in B cell differentiation[35] this likely reflects a role  
456 for MYB in blocking differentiation at the highly proliferative pre-B cell stage.

457

458 In addition to targets directly identified by SB integration, our RNA-Seq analysis of  
459 *Pax5<sup>+/-</sup> x Ebf1<sup>+/-</sup>* and *SB x Pax5<sup>+/-</sup> x Ebf1<sup>+/-</sup>* leukemias also identified other deregulated  
460 signaling pathways. One of the most prominently deregulated pathways involved the  
461 serine/threonine kinase PDK1. PDK1 expression was modestly but significantly  
462 upregulated in *Ebf1<sup>+/-</sup>* and *Pax5<sup>+/-</sup> x Ebf1<sup>+/-</sup>* pre-leukemic progenitor B cells, and  
463 significantly further elevated in *Pax5<sup>+/-</sup> x Ebf1<sup>+/-</sup>* leukemias. The mechanism by which  
464 increased PDK1 expression promotes transformation is unclear. However, previous  
465 studies have shown that PDK1 interacts with SGK1/3 to inhibit TSC2 function and  
466 expression[22]. This results in increased function of RHEB or RHEBL1, which in turn  
467 promote mTOR function and ultimately MYC expression[22]. Consistent with this model  
468 we found that *Tsc2* expression levels were reduced in *Pax5<sup>+/-</sup> x Ebf1<sup>+/-</sup>* leukemias while  
469 *Sgk3*, *Rheb1* and *Myc* levels were increased. An alternative pathway that could also  
470 be affected by PDK1 involves PDK1-dependent activation of PLK1, which in turn has  
471 been shown to phosphorylate and activates MYC[23]. Thus, there are a number of  
472 potential mechanisms by which increased PDK1 expression could promote  
473 transformation. What is clear is that PDK1 inhibitors effectively blocked proliferation of  
474 *Pax5<sup>+/-</sup> x Ebf1<sup>+/-</sup>* primary leukemia cell lines in vitro. Since there are currently a number  
475 of PDK1 inhibitors available with some demonstrating efficacy in preclinical trials[36,  
476 37], our findings suggest that PDK1 inhibition might be an effective strategy for treating  
477 B cell leukemias that exhibit reduced expression of *Pax5* and *Ebf1*.

## 478 **ACKNOWLEDGEMENTS**

479 We thank A. Rost, for technical assistance with mouse breeding; the University of  
480 Minnesota's Supercomputing Institute for providing computing and bioinformatic  
481 resources; Dr. Meinrad Busslinger (*Pax5<sup>+/-</sup>*), Dr. Rudolf Grosschedl (*Ebf1<sup>-/-</sup>*), Dr. Peter  
482 Johnson (*Cebpa<sup>-/-</sup>*), Dr. Andrew Wells (*Ikzf1<sup>-/-</sup>*) and Dr. David Largaespada (*Rosa26<sup>LSL-</sup>*  
483 *SB11 T2/OncxRosa26<sup>LSL-SB11</sup>*) for providing the indicated mouse strains. The results  
484 published here are in part based upon data generated by the Therapeutically Applicable  
485 Research to Generate Effective Treatments (TARGET) initiative, phs000218, managed  
486 by the NCI. This work was supported by a Cancer Research Institute Investigator  
487 award, a Leukemia and Lymphoma Society Scholar award, funding from the UMN  
488 Masonic Cancer center and grants from the NIH (RO1 CA232317) to MAF. TKS was  
489 supported by grants from the Randy Shaver Cancer Research and Community Fund,  
490 NIH NCI (R21 CA216652), and the Masonic Cancer Center. ALS was supported by  
491 NCI (CA211249) and Masonic Cancer Center Support Grant (CA077598). SMK was  
492 supported by CPRIT MIRA RP 160693 and NIH/NCI P50 CA100632-09.

493

## 494 **Authors' Contribution**

495 **Conception and design:** L. Heltemes-Harris and M. Farrar

496 **Development of Methodology:** L. Heltemes-Harris, A. Sarver, S. Kornblau and M.

497 Farrar

498 **Acquisition of data (provided animals, acquired and managed patients, provided**

499 **facilities, etc.)** L. Heltemes-Harris, G. Hubbard, A. Sarver, T. Knutson, S. Kornblau

500 and M. Farrar

501 **Analysis and interpretation of data (e.g., statistical analysis, biostatistics, computational**  
502 **analysis):** L. Heltemes-Harris, G. Hubbard, R. LaRue, T. Starr, S. Munro, T. Knutson, C.  
503 Henzler, A. R. Yang, A. Sarver, S. Kornblau and M. Farrar.

504 **Writing, review, and/or revision of the manuscript:** L. Heltemes-Harris, G. Hubbard,  
505 R. LaRue, T. Starr, S. Munro, C. Henzler, R. Yang, A. Sarver, S. Kornblau and M.  
506 Farrar.

507 **Administrative, technical, or material support (i.e., reporting or organizing data,**  
508 **constructing databases):** L. Heltemes-Harris

509 **Study Supervision:** L. Heltemes-Harris, M. Farrar

510 **Conflict of interest**

511 The authors declare no conflicts of interest.



512 **References**

513

- 514 1 Mullighan CG, Goorha S, Radtke I, Miller CB, Coustan-Smith E, Dalton JD *et al.*  
515 Genome-wide analysis of genetic alterations in acute lymphoblastic leukaemia.  
516 *Nature* 2007; 446: 758-764.  
517
- 518 2 Mullighan CG, Su X, Zhang J, Radtke I, Phillips LA, Miller CB *et al.* Deletion of  
519 IKZF1 and prognosis in acute lymphoblastic leukemia. *N Engl J Med* 2009; 360:  
520 470-480.  
521
- 522 3 Mullighan CG. The genomic landscape of acute lymphoblastic leukemia in  
523 children and young adults. *Hematology Am Soc Hematol Educ Program* 2014;  
524 2014: 174-180.  
525
- 526 4 Mullighan CG, Miller CB, Radtke I, Phillips LA, Dalton J, Ma J *et al.* BCR-ABL1  
527 lymphoblastic leukaemia is characterized by the deletion of Ikaros. *Nature* 2008;  
528 453: 110-114.  
529
- 530 5 Lin H, Grosschedl R. Failure of B-cell differentiation in mice lacking the  
531 transcription factor EBF. *Nature* 1995; 376: 263-267.  
532
- 533 6 Urbanek P, Wang ZQ, Fetka I, Wagner EF, Busslinger M. Complete block of  
534 early B cell differentiation and altered patterning of the posterior midbrain in mice  
535 lacking Pax5/BSAP. *Cell* 1994; 79: 901-912.  
536
- 537 7 Chiang YJ, Kole HK, Brown K, Naramura M, Fukuhara S, Hu RJ *et al.* Cbl-b  
538 regulates the CD28 dependence of T-cell activation. *Nature* 2000; 403: 216-220.  
539
- 540 8 Wang JH, Nichogiannopoulou A, Wu L, Sun L, Sharpe AH, Bigby M *et al.*  
541 Selective defects in the development of the fetal and adult lymphoid system in  
542 mice with an Ikaros null mutation. *Immunity* 1996; 5: 537-549.  
543
- 544 9 Verbeek S, Izon D, Hofhuis F, Robanus-Maandag E, te Riele H, van de Wetering  
545 M *et al.* An HMG-box-containing T-cell factor required for thymocyte  
546 differentiation. *Nature* 1995; 374: 70-74.  
547
- 548 10 Lee YH, Sauer B, Johnson PF, Gonzalez FJ. Disruption of the *c/ebp* alpha gene  
549 in adult mouse liver. *Mol Cell Biol* 1997; 17: 6014-6022.  
550
- 551 11 Heltemes-Harris LM, Willette MJ, Ramsey LB, Qiu YH, Neeley ES, Zhang N *et al.*  
552 *Ebf1* or *Pax5* haploinsufficiency synergizes with *STAT5* activation to initiate acute  
553 lymphoblastic leukemia. *The Journal of experimental medicine* 2011; 208: 1135-  
554 1149.  
555

- 556 12 Winandy S, Wu P, Georgopoulos K. A dominant mutation in the Ikaros gene  
557 leads to rapid development of leukemia and lymphoma. *Cell* 1995; 83: 289-299.  
558
- 559 13 Papathanasiou P, Perkins AC, Cobb BS, Ferrini R, Sridharan R, Hoyne GF *et al.*  
560 Widespread failure of hematolymphoid differentiation caused by a recessive  
561 niche-filling allele of the Ikaros transcription factor. *Immunity* 2003; 19: 131-144.  
562
- 563 14 Heath V, Suh HC, Holman M, Renn K, Gooya JM, Parkin S *et al.* C/EBPalpha  
564 deficiency results in hyperproliferation of hematopoietic progenitor cells and  
565 disrupts macrophage development in vitro and in vivo. *Blood* 2004; 104: 1639-  
566 1647.  
567
- 568 15 Prasad MA, Ungerback J, Ahsberg J, Somasundaram R, Strid T, Larsson M *et al.*  
569 Ebf1 heterozygosity results in increased DNA damage in pro-B cells and their  
570 synergistic transformation by Pax5 haploinsufficiency. *Blood* 2015.  
571
- 572 16 Alexandrov LB, Nik-Zainal S, Wedge DC, Aparicio SA, Behjati S, Biankin AV *et*  
573 *al.* Signatures of mutational processes in human cancer. *Nature* 2013; 500: 415-  
574 421.  
575
- 576 17 Starr TK, Largaespada DA. Cancer gene discovery using the Sleeping Beauty  
577 transposon. *Cell cycle (Georgetown, Tex)* 2005; 4: 1744-1748.  
578
- 579 18 Temiz NA, Moriarity BS, Wolf NK, Riordan JD, Dupuy AJ, Largaespada DA *et al.*  
580 RNA sequencing of Sleeping Beauty transposon-induced tumors detects  
581 transposon-RNA fusions in forward genetic cancer screens. *Genome research*  
582 2016; 26: 119-129.  
583
- 584 19 Goetz CA, Harmon IR, O'Neil JJ, Burchill MA, Farrar MA. STAT5 activation  
585 underlies IL7 receptor-dependent B cell development. *J Immunol* 2004; 172:  
586 4770-4778.  
587
- 588 20 Katerndahl CDS, Heltemes-Harris LM, Willette MJL, Henzler CM, Fietze S, Yang  
589 R *et al.* Antagonism of B cell enhancer networks by STAT5 drives leukemia and  
590 poor patient survival. *Nature immunology* 2017; 18: 694-704.  
591
- 592 21 Oettgen HF, Old LJ, Boyse EA, Campbell HA, Philips FS, Clarkson BD *et al.*  
593 Inhibition of leukemias in man by L-asparaginase. *Cancer Res* 1967; 27: 2619-  
594 2631.  
595
- 596 22 Castel P, Ellis H, Bago R, Toska E, Razavi P, Carmona FJ *et al.* PDK1-SGK1  
597 Signaling Sustains AKT-Independent mTORC1 Activation and Confers  
598 Resistance to PI3Kalpha Inhibition. *Cancer Cell* 2016; 30: 229-242.  
599
- 600 23 Tan J, Li Z, Lee PL, Guan P, Aau MY, Lee ST *et al.* PDK1 signaling toward  
601 PLK1-MYC activation confers oncogenic transformation, tumor-initiating cell

- 602 activation, and resistance to mTOR-targeted therapy. *Cancer Discov* 2013; 3:  
603 1156-1171.
- 604
- 605 24 Kornblau SM, Tibes R, Qiu YH, Chen W, Kantarjian HM, Andreeff M *et al.*  
606 Functional proteomic profiling of AML predicts response and survival. *Blood*  
607 2009; 113: 154-164.
- 608
- 609 25 Scott MC, Temiz NA, Sarver AE, LaRue RS, Rathe SK, Varshney J *et al.*  
610 Comparative Transcriptome Analysis Quantifies Immune Cell Transcript Levels,  
611 Metastatic Progression, and Survival in Osteosarcoma. *Cancer research* 2018;  
612 78: 326-337.
- 613
- 614 26 Chen EY, Tan CM, Kou Y, Duan Q, Wang Z, Meirelles GV *et al.* Enrichr:  
615 interactive and collaborative HTML5 gene list enrichment analysis tool. *BMC*  
616 *Bioinformatics* 2013; 14: 128.
- 617
- 618 27 Kuleshov MV, Jones MR, Rouillard AD, Fernandez NF, Duan Q, Wang Z *et al.*  
619 Enrichr: a comprehensive gene set enrichment analysis web server 2016 update.  
620 *Nucleic Acids Res* 2016; 44: W90-97.
- 621
- 622 28 Xiao X, Yang G, Bai P, Gui S, Nyuyen TM, Mercado-Uribe I *et al.* Inhibition of  
623 nuclear factor-kappa B enhances the tumor growth of ovarian cancer cell line  
624 derived from a low-grade papillary serous carcinoma in p53-independent  
625 pathway. *BMC Cancer* 2016; 16: 582.
- 626
- 627 29 Chen F, Castranova V. Nuclear factor-kappaB, an unappreciated tumor  
628 suppressor. *Cancer research* 2007; 67: 11093-11098.
- 629
- 630 30 Kuiper RP, Waanders E, van der Velden VH, van Reijmersdal SV,  
631 Venkatachalam R, Scheijen B *et al.* IKZF1 deletions predict relapse in uniformly  
632 treated pediatric precursor B-ALL. *Leukemia* 2010; 24: 1258-1264.
- 633
- 634 31 Liu GJ, Cimmino L, Jude JG, Hu Y, Witkowski MT, McKenzie MD *et al.* Pax5 loss  
635 imposes a reversible differentiation block in B-progenitor acute lymphoblastic  
636 leukemia. *Genes & development* 2014; 28: 1337-1350.
- 637
- 638 32 Ungerback J, Ahsberg J, Strid T, Somasundaram R, Sigvardsson M. Combined  
639 heterozygous loss of Ebf1 and Pax5 allows for T-lineage conversion of B cell  
640 progenitors. *The Journal of experimental medicine* 2015; 212: 1109-1123.
- 641
- 642 33 Heltemes-Harris LM, Larson JD, Starr TK, Hubbard GK, Sarver AL, Largaespada  
643 DA *et al.* Sleeping Beauty transposon screen identifies signaling modules that  
644 cooperate with STAT5 activation to induce B-cell acute lymphoblastic leukemia.  
645 *Oncogene* 2015.
- 646

- 647 34 Xia Y, Shen S, Verma IM. NF-kappaB, an active player in human cancers.  
648 *Cancer Immunol Res* 2014; 2: 823-830.  
649
- 650 35 Fahl SP, Crittenden RB, Allman D, Bender TP. c-Myb is required for pro-B cell  
651 differentiation. *J Immunol* 2009; 183: 5582-5592.  
652
- 653 36 Emmanouilidi A, Fyffe CA, Ferro R, Edling CE, Capone E, Sestito S *et al.*  
654 Preclinical validation of 3-phosphoinositide-dependent protein kinase 1 inhibition  
655 in pancreatic cancer. *J Exp Clin Cancer Res* 2019; 38: 191.  
656
- 657 37 Barile E, De SK, Pellicchia M. PDK1 inhibitors. *Pharm Pat Anal* 2012; 1: 145-  
658 163.  
659  
660

661 **Figure Legends**

662 **Figure 1.** Compound haploinsufficiency for transcription factor genes drives B cell  
663 or T cell leukemia. **A** Kaplan-Meier survival analysis of mice of the indicated  
664 genotype. **B** Flow cytometric analysis of control C57Bl/6 bone marrow (BM) cells or  
665 bone marrow, lymph node (LN), and spleen cells from *Pax5*<sup>+/-</sup> *x* *Ebf1*<sup>+/-</sup> leukemic mice.  
666 Representative flow cytometric analysis of B220, CD19, and IgM expression is  
667 shown. Doublets were gated out and a lymphocyte gate was set based on side and  
668 forward scatter properties. All gates shown are based on bone marrow isolated from  
669 control C57Bl/6 mice. **C** Pie charts showing the number of leukemias from each  
670 genotype that were either of the B cell (Blue) or T cell (Red) phenotype; grey  
671 represents mice that either failed to develop leukemia or developed mixed lineage  
672 leukemia (grey). **D** Flow cytometric analysis of bone marrow cells from control  
673 C57Bl/6 and *Pax5*<sup>+/-</sup> *x* *Ebf1*<sup>+/-</sup> *x* *Ikzf1*<sup>+/-</sup> leukemic mice. Representative flow cytometric  
674 analysis of B220, CD3, CD4, and CD8 expression on bone marrow cells is shown.  
675 Doublets were gated out and a lymphocyte gate was set based on side and forward  
676 scatter properties. All gates shown are based on bone marrow isolated from control  
677 C57Bl/6 mice.

678 **Figure 2.** Missense mutations in primary human ALL. **A** Histogram showing the  
679 distribution of missense mutations per sample across 486 primary human B-ALL  
680 samples from the TARGET phase-2 study. SNV/indel variants were called across all  
681 genes by MuTect2. Samples were classified as high or low mutation burden based  
682 on the natural break in the bimodal distribution (low < 669, high > 863

683 variants/sample). The percentage of samples in the high category is labeled inside  
684 the plot. **B** Bar graph summarizing the percentage of samples with high mutation  
685 burden compared to low for all B-ALL samples or various subsets. **C** Bar graph  
686 summarizing the total number of primary human B-ALL samples displaying high or  
687 low missense mutation burden. Samples affected by loss of function alleles in  
688 various genes (*CDKN2a*, *EBF1*, *PAX5*, and *IKZF1*) or contain certain gene-fusions  
689 (*ETV6-RUNX1*, *TCF3-PBX1*) were shown as subsets. \*  $p < 0.0114$  Fisher's exact test.

690

691 **Figure 3.** Sleeping Beauty mutagenesis screen to identify genes that cooperate  
692 with *Pax5* and *Ebf1* heterozygosity to induce leukemia. **A** Kaplan-Meier survival  
693 analysis of mice comparing *Pax5*<sup>+/-</sup> x *Ebf1*<sup>+/-</sup> leukemic mice (n=51) and SB *Pax5*<sup>+/-</sup> x  
694 *Ebf1*<sup>+/-</sup> (n=34) leukemic mice to control mice SB x *Cd79a-Cre* (n=17). P-value  
695 compares *Pax5*<sup>+/-</sup> x *Ebf1*<sup>+/-</sup> versus SB *Pax5*<sup>+/-</sup> x *Ebf1*<sup>+/-</sup> mice. **B** Table indicating all of  
696 the samples used in RNA-seq analysis. The table indicated the status, type and  
697 number of samples utilized for the RNA-Seq. Control samples represent progenitor  
698 B cell pools from 7-8 mice. **C** Hierarchical clustering of all leukemic and control  
699 samples. **D** Fusions identified from RNA-seq analysis of our sleeping beauty  
700 mutagenesis screen. This chart identifies recurrent insertions found in 27 of the 31  
701 samples tested and indicate how many mice had each specific gene insertion. **E**  
702 Matrix analysis of individual mice by gene identified in fusion analysis.

703

704 **Figure 4. Increased Expression of Stat5b in leukemia. A** Map of common

705 insertion sites in the *Stat5b* gene; numbers refer to number of insertions at a  
706 particular site. **B** Quantitative Real Time PCR (qRT-PCR) for *Stat5b* normalized to  
707 *Actin* in progenitor B cells isolated from the bone marrow of WT (black, n=4) mice,  
708 and leukemic cells isolated from the lymph nodes of *Pax5<sup>+/-</sup> x Ebf1<sup>+/-</sup>* (purple, n=6)  
709 and SB *Pax5<sup>+/-</sup> x Ebf1<sup>+/-</sup>* mice. The samples from the SB *Pax5<sup>+/-</sup> x Ebf1<sup>+/-</sup>* mice were  
710 split between those with (blue, n=15) or without (red, n=10) an insertion in the *Stat5b*  
711 locus. The normalized values were log2 transformed and an ordinary one-way  
712 ANOVA with Holm-Sidak's multiple comparison test was used to determine  
713 significance. The line represents the median value. **C** Log2 transformed fragments  
714 per kilobase of exon model per million reads mapped (FPKM) values from WT (black  
715 filled, n=3), *Pax5<sup>+/-</sup>* (green filled, n=4), *Ebf1<sup>+/-</sup>* (green open, n=4), *Pax5<sup>+/-</sup> x Ebf1<sup>+/-</sup>* pre-  
716 leukemic (purple open, n=4), *Pax5<sup>+/-</sup> x Ebf1<sup>+/-</sup>* leukemic (purple filled, n=7), and SB  
717 *Pax5<sup>+/-</sup> x Ebf1<sup>+/-</sup>* leukemic samples with (blue filled, n=20) or without (red filled, n=11)  
718 a transposon insertion in *Stat5b* locus. A Kruskal-Wallis test with Dunn's multiple  
719 comparison test was used to test for significance. The line represents the median  
720 value. **D** Western blot analysis showing increased expression of STAT5. The + or -  
721 indicates the presence or absence of a SB transposon insertion in each  
722 representative sample. **E** Plotted ratio of STAT5 to actin from the western blot.  
723 Samples were plotted according to transposon insert status where those samples  
724 without a transposon insert are red (n=7) and those with a transposon insert are blue  
725 (n=6). Significance was determined using an unpaired student t-test and the line  
726 represents the median. **F** Flow cytometric analysis of bone marrow cells from *Pax5<sup>+/-</sup>*  
727 *x Ebf1<sup>+/-</sup>* leukemic mice. Representative flow cytometric analysis of pSTAT5

728 expression in cells where doublets were gated out, a lymphocyte gate was applied,  
729 and cells were further gated on B220 and AA4.1. This is representative of 5  
730 independent experiments. **G** Flow cytometric analysis of leukemic B cells from  
731 *Pax5<sup>+/-</sup> x Ebf1<sup>+/-</sup>* leukemic mice. Lymph node cells from leukemic mice or bone  
732 marrow cells from WT mice were activated with IL-7 for 30 minutes and subjected to  
733 flow cytometric analysis for pSTAT5 expression. Doublets were gated out, a  
734 lymphocyte gate was applied, and cells were further gated on B220 and AA4.1. This  
735 is a representative plot of 4 independent experiments. **H** Log2 transformed FPKM  
736 values for *Cish* from WT (black filled, n=3), *Pax5<sup>+/-</sup>* (green filled, n=4), *Ebf1<sup>+/-</sup>* (green  
737 open, n=4), *Pax5<sup>+/-</sup> x Ebf1<sup>+/-</sup>* pre-leukemic (purple open, n=4), *Pax5<sup>+/-</sup> x Ebf1<sup>+/-</sup>*  
738 leukemic (purple filled, n=7), and SB *Pax5<sup>+/-</sup> x Ebf1<sup>+/-</sup>* leukemic (blue filled, n=31)  
739 samples. An ordinary one-way ANOVA with multiple comparisons was used to test  
740 for significance. The line represents the median value. **I** Log2 transformed FPKM  
741 values for *Socs2* from WT (black filled, n=3), *Pax5<sup>+/-</sup>* (green open, n=4), *Ebf1<sup>+/-</sup>* (green  
742 filled, n=4), *Pax5<sup>+/-</sup> x Ebf1<sup>+/-</sup>* pre-leukemic (purple open, n=4), *Pax5<sup>+/-</sup> x Ebf1<sup>+/-</sup>*  
743 leukemic (purple filled, n=7), and SB *Pax5<sup>+/-</sup> x Ebf1<sup>+/-</sup>* leukemic (blue filled, n=31)  
744 samples. An ordinary one-way ANOVA with Holm-Sidak's test for multiple  
745 comparisons was used to test for significance. The line represents the median value.

746

747 **Figure 5. Loss of *Cblb* accelerates the onset of B cell ALL.** **A** Map of common  
748 insertion sites in the *Cblb* gene; numbers represent number of insertions at a specific  
749 site. **B** qRT-PCR for *Cblb* normalized to *Actin* in progenitor B cells isolated from the



750 bone marrow of WT (black, n=4) mice, and leukemic cells isolated from the lymph  
751 nodes of *Pax5<sup>+/-</sup> x Ebf1<sup>+/-</sup>* (purple, n=6) and SB *Pax5<sup>+/-</sup> x Ebf1<sup>+/-</sup>* mice. The samples  
752 from the SB *Pax5<sup>+/-</sup> x Ebf1<sup>+/-</sup>* mice were split between those with (blue, n=8) or without  
753 (red, n=17) an insertion in the *Cblb* locus. The normalized values were log<sub>2</sub>  
754 transformed and significance was determined using a Kruskal-Wallis test with Dunn's  
755 multiple comparison test. The line represents the median value. **C** Western blot  
756 analysis showing expression of CBLB. The + or - indicates the presence or absence  
757 of a SB transposon insertion in each representative sample. **D** Plotted ratio of CBLB  
758 to actin from the western blot. Samples were plotted according to transposon insert  
759 status where those samples without a transposon insert are red (n=6) and those with  
760 a transposon insert are blue (n=8). Significance was determined using an unpaired  
761 student t-test and the line represents the median. **E** Kaplan-Meier survival analysis of  
762 mice comparing *Pax5<sup>+/-</sup> x Ebf1<sup>+/-</sup>* leukemic mice (n=51) and *Cblb<sup>-/-</sup> x Pax5<sup>+/-</sup> x Ebf1<sup>+/-</sup>*  
763 (n=13) leukemic mice.

764

765 **Figure 6.** Loss of MYB expression results in worse outcome in ALL. **A** Map of  
766 common insertion sites in the *Myb* gene; numbers refer to number of insertions at a  
767 specific site. **B** qRT-PCR for *Myb* normalized to *Actin* in progenitor B cells isolated  
768 from the bone marrow of WT (black, n=4) mice, and leukemic cells isolated from the  
769 lymph nodes of *Pax5<sup>+/-</sup> x Ebf1<sup>+/-</sup>* (purple, n=6) and SB *Pax5<sup>+/-</sup> x Ebf1<sup>+/-</sup>* mice. The  
770 samples from the SB *Pax5<sup>+/-</sup> x Ebf1<sup>+/-</sup>* mice were split between those with (blue, n=8)  
771 or without (red, n=17) an insertion in the *Myb* locus. The significance was tested  
772 using an ordinary one-way ANOVA with Holm-Sidak's multiple comparison test and

773 the lines represent median. **C** Log<sub>2</sub> transformed fragments per kilobase of exon  
774 model per million reads mapped (FPKM) values from WT (black filled, n=3), *Pax5*<sup>+/-</sup>  
775 (green filled, n=4), *Ebf1*<sup>+/-</sup> (green open, n=4), *Pax5*<sup>+/-</sup> x *Ebf1*<sup>+/-</sup> pre-leukemic (purple  
776 open, n=4), *Pax5*<sup>+/-</sup> x *Ebf1*<sup>+/-</sup> leukemic (purple filled, n=7), and SB *Pax5*<sup>+/-</sup> x *Ebf1*<sup>+/-</sup>  
777 leukemic samples with (blue filled, n=10) or without (red filled, n=21) a transposon  
778 insertion. Significance was tested using a Kruskal-Wallis test with Dunn's multiple  
779 comparison test and the line represents median. **D** Western blot analysis showing  
780 decreased expression of MYB in SB leukemia samples harboring a transposon  
781 insertion. The + or - indicates the presence or absence of a SB transposon insertion  
782 in each representative sample. **E** Plotted ratio of MYB to actin from the western blot  
783 in panel d. Samples were plotted according to transposon insert status where those  
784 samples without a transposon insert are red (n=4) and those with a transposon insert  
785 are blue (n=8). Significance was determined using an unpaired student t-test and the  
786 line represents the median. **F** Linear regression analysis comparing date of death  
787 versus FPKM value for leukemic samples harboring a transposon insertion. The  
788 dashed lines represent 95% confidence bands.

789

790 **Figure 7.** Inhibition of PDK1 blocks leukemic proliferation. **A** Log<sub>2</sub> transformed  
791 FPKM values for *Pdk1* from the RNA-seq datasets. Significance was determined by  
792 an ordinary one-way ANOVA with Holm-Sidak's multiple comparison test. **B** Log<sub>2</sub>  
793 transformed FPKM values for *Sgk3* from the RNA-seq datasets. Significance was  
794 tested using a Kruskal-Wallis test with Dunn's multiple comparison test. **C** Log<sub>2</sub>  
795 transformed FPKM values for *Myc* from the RNA-seq datasets. Significance was

796 determined by an ordinary one-way ANOVA with Holm-Sidak's multiple comparison  
797 test. **D** PDK1 inhibitor blocks growth. MTT assay was performed on two *Pax5<sup>+/-</sup>* x  
798 *Ebf1<sup>+/-</sup>* leukemic cell lines generated from lymph node cells from leukemic mice. The  
799 cells were subjected to differing concentrations of GSK2334470. Each dot  
800 represents the average of two biological replicates - each biological replicate  
801 represents the mean of triplicate technical replicates within an experiment. Error  
802 bars represent the range between experiments. **E** Overall survival of *Bcr-Abl*  
803 patients. *Bcr-Abl* patients were separated into three equal groups representing  
804 higher (black line, n=14), intermediate (red line, n=28) and lower (blue line, n=14)  
805 levels of PDK1. Patients with lower levels of PDK1 did significantly worse than  
806 patients with higher PDK1 (p=0.04, Log Rank test for trend). **F** Overall survival of  
807 *Bcr-Abl* young adult patients. Young adult patients were separated into two equal  
808 groups representing higher (red line, n=9) and lower (blue line, n=9) levels of PDK1.  
809 Patients with lower levels of PDK1 did significantly worse than patients with higher  
810 PDK1 (p=0.02, Log Rank (Mantel-Cox) Test). **G** PDK1 expression of *Bcr-Abl* patients  
811 split by relapse status. *Bcr-Abl* patients were separated into two groups  
812 representing no relapse (blue dots, n=14), and relapse (red dots, n=14) levels of  
813 PDK1 were graphed. Patients with lower levels of PDK1 did significantly worse than  
814 patients with higher PDK1 (p<0.01, unpaired T-test). **H** PDK1 expression of *B-Nos*  
815 patients split by relapse status. Patients were separated into two groups  
816 representing no relapse (blue dots, n=14), and relapse (red dots, n=14) and levels of  
817 PDK1 were graphed. Patients with lower levels of PDK1 did significantly worse than

818 patients with higher PDK1 ( $p < 0.02$ , unpaired T-test)

819

820 **Figure 8.** Transcriptome profiles from leukemic progenitor B cells show common  
821 interleukemic transcriptional variation across human and mouse samples. **A** Common  
822 transcriptional patterns identified in RNA-Seq from human leukemias. Top ~8000 gene  
823 values defined by SD in ph2\_SJ and ph2\_BCCA separately identify conserved  
824 transcriptional patterns to be present. Red bars indicate highly significantly enriched  
825 sets of conserved genes to be present across Human ALL datasets via Fisher exact  
826 test comparison of gene cluster membership. Gene transcript values derived from  
827 human leukemias were log transformed and mean centered within each species.  
828 Invariant (low SD) genes were removed prior to unsupervised average linkage  
829 clustering. Conservation was apparent despite the fact that the SJ set was summarized  
830 as gene symbols while the BCCA set was summarized to ENSEMBL ids. Transcripts  
831 with increased levels are shown in yellow, while transcripts with decreased levels are  
832 shown in blue. **B** Gene cluster overlap analyses comparing clusters derived from  
833 human and mouse tumors show that the variation present in our mouse dataset  
834 represents one of the clear variations present and conserved in all of the human  
835 samples. Gene lists for the conserved cluster from each dataset are provided in  
836 Supplementary Table S2.

## Figure 1

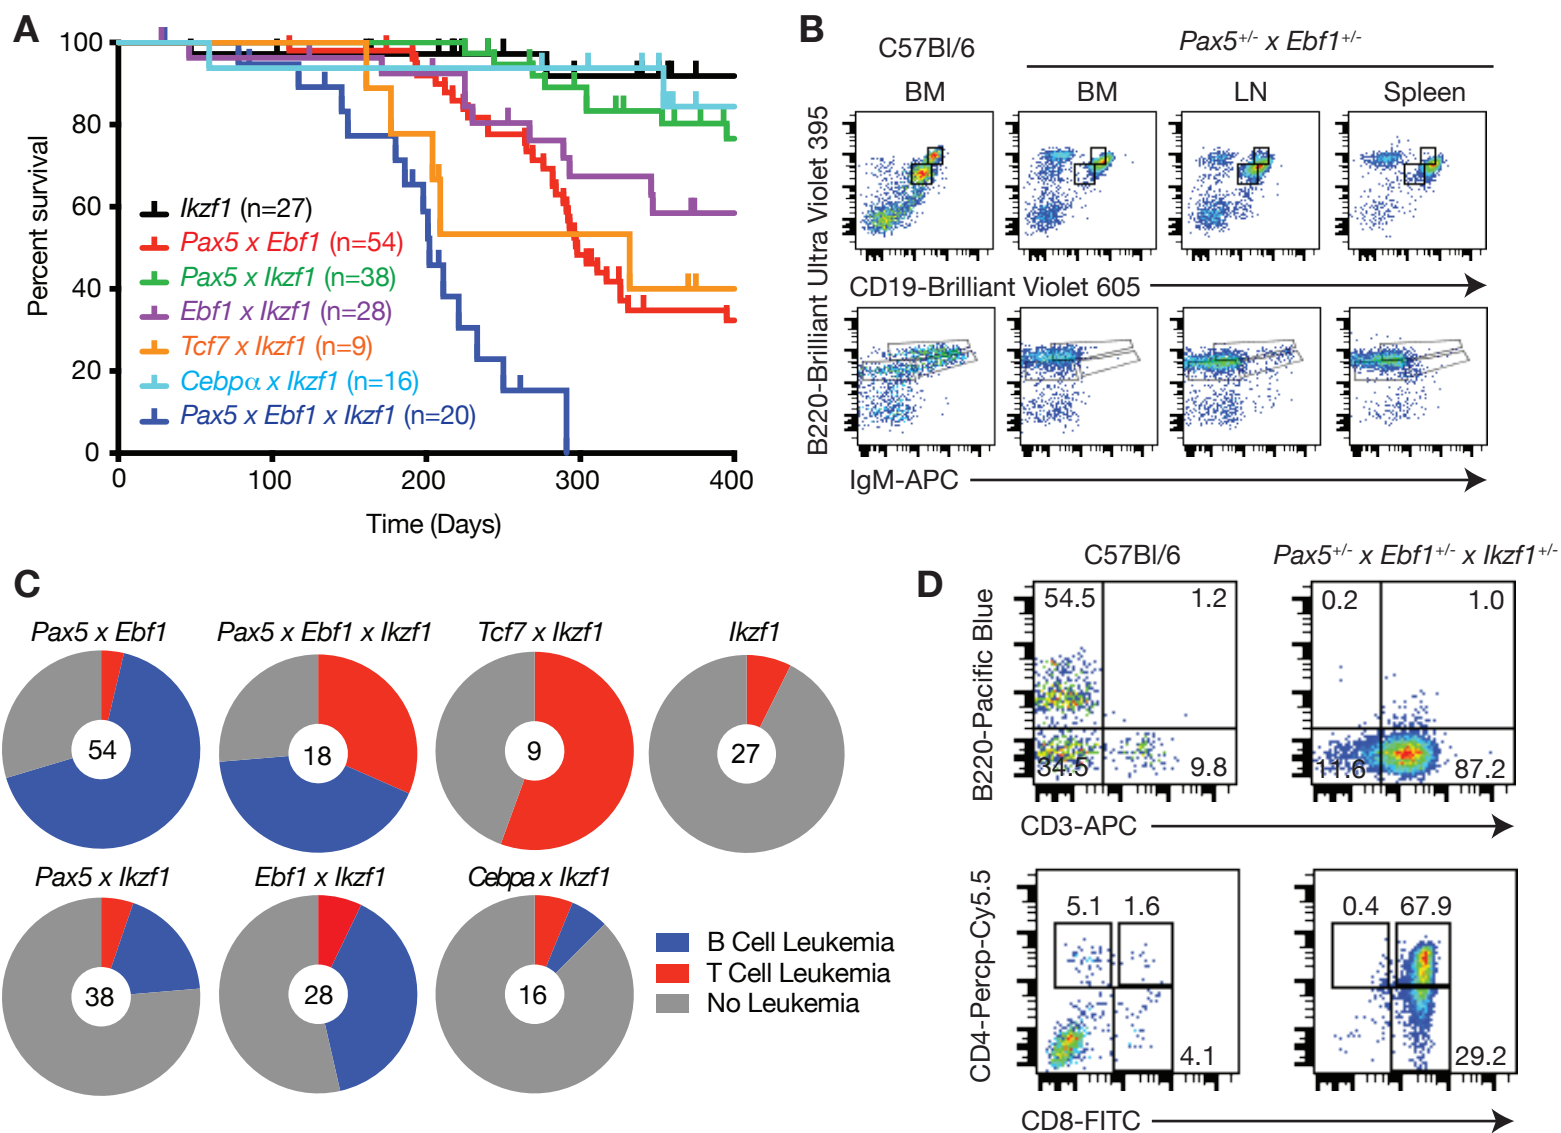

Figure 2

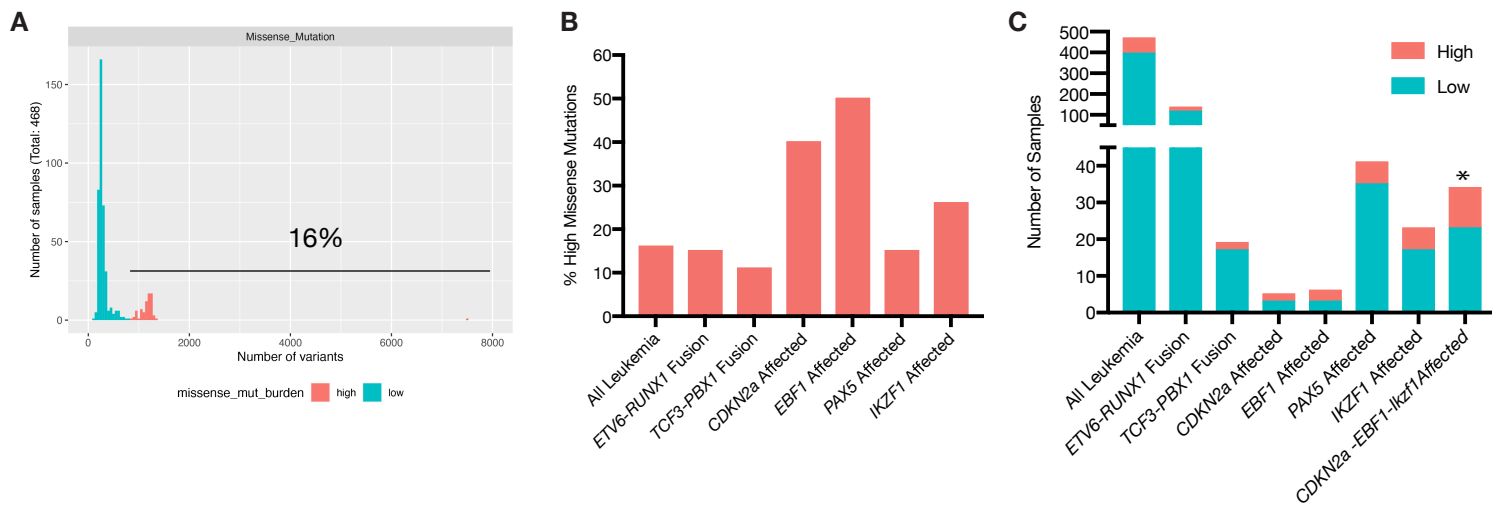

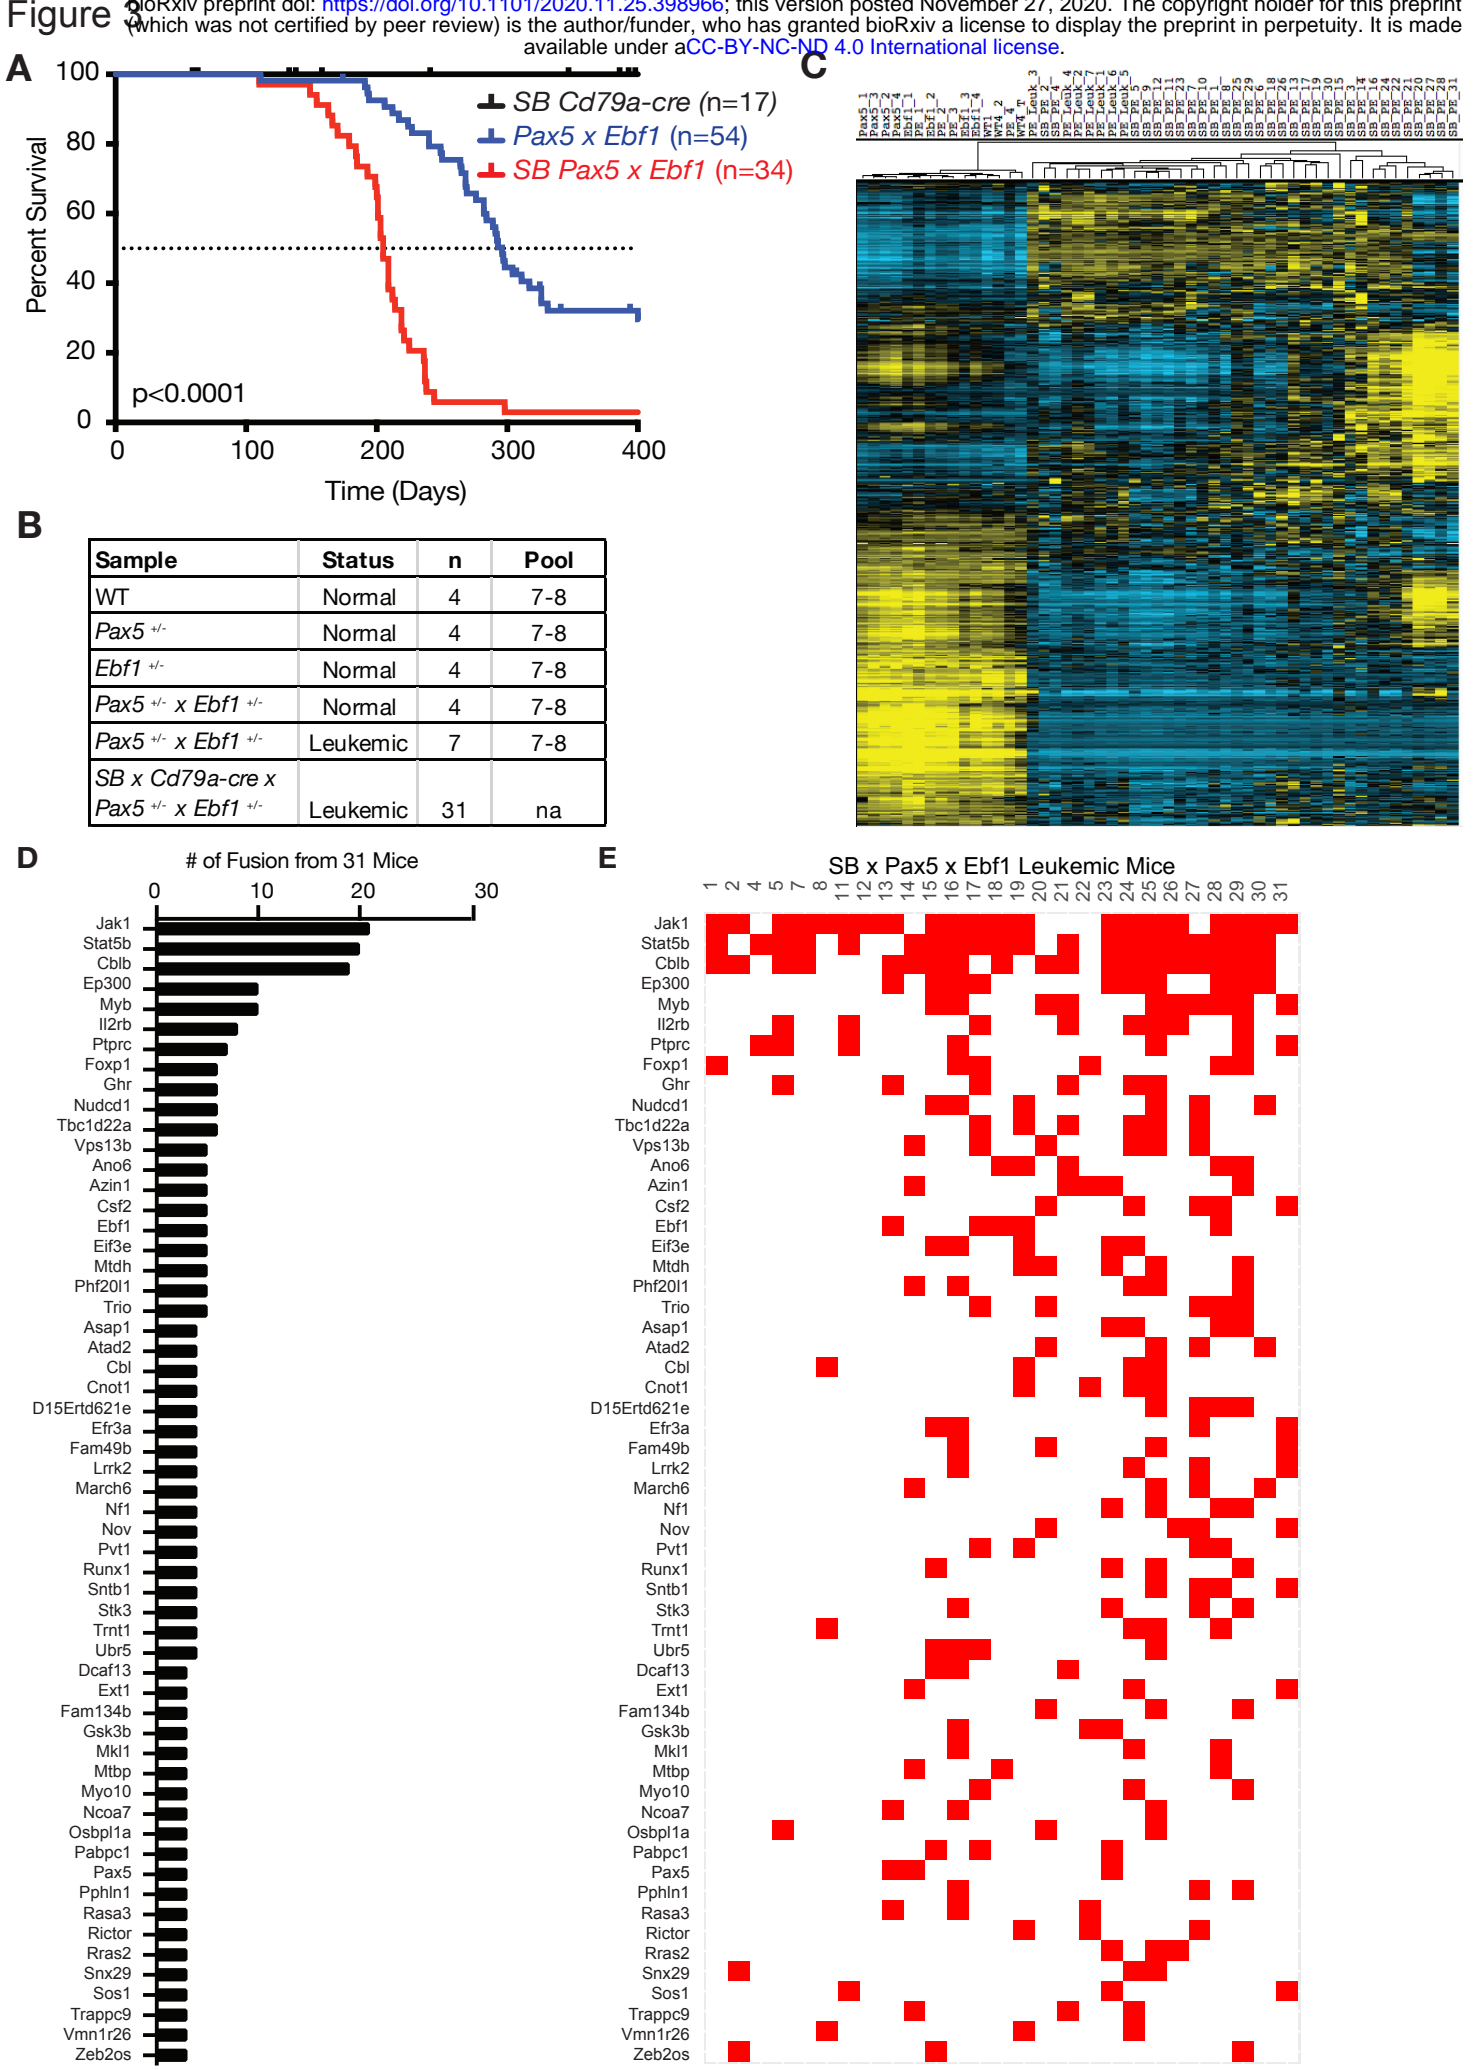

## Figure 4

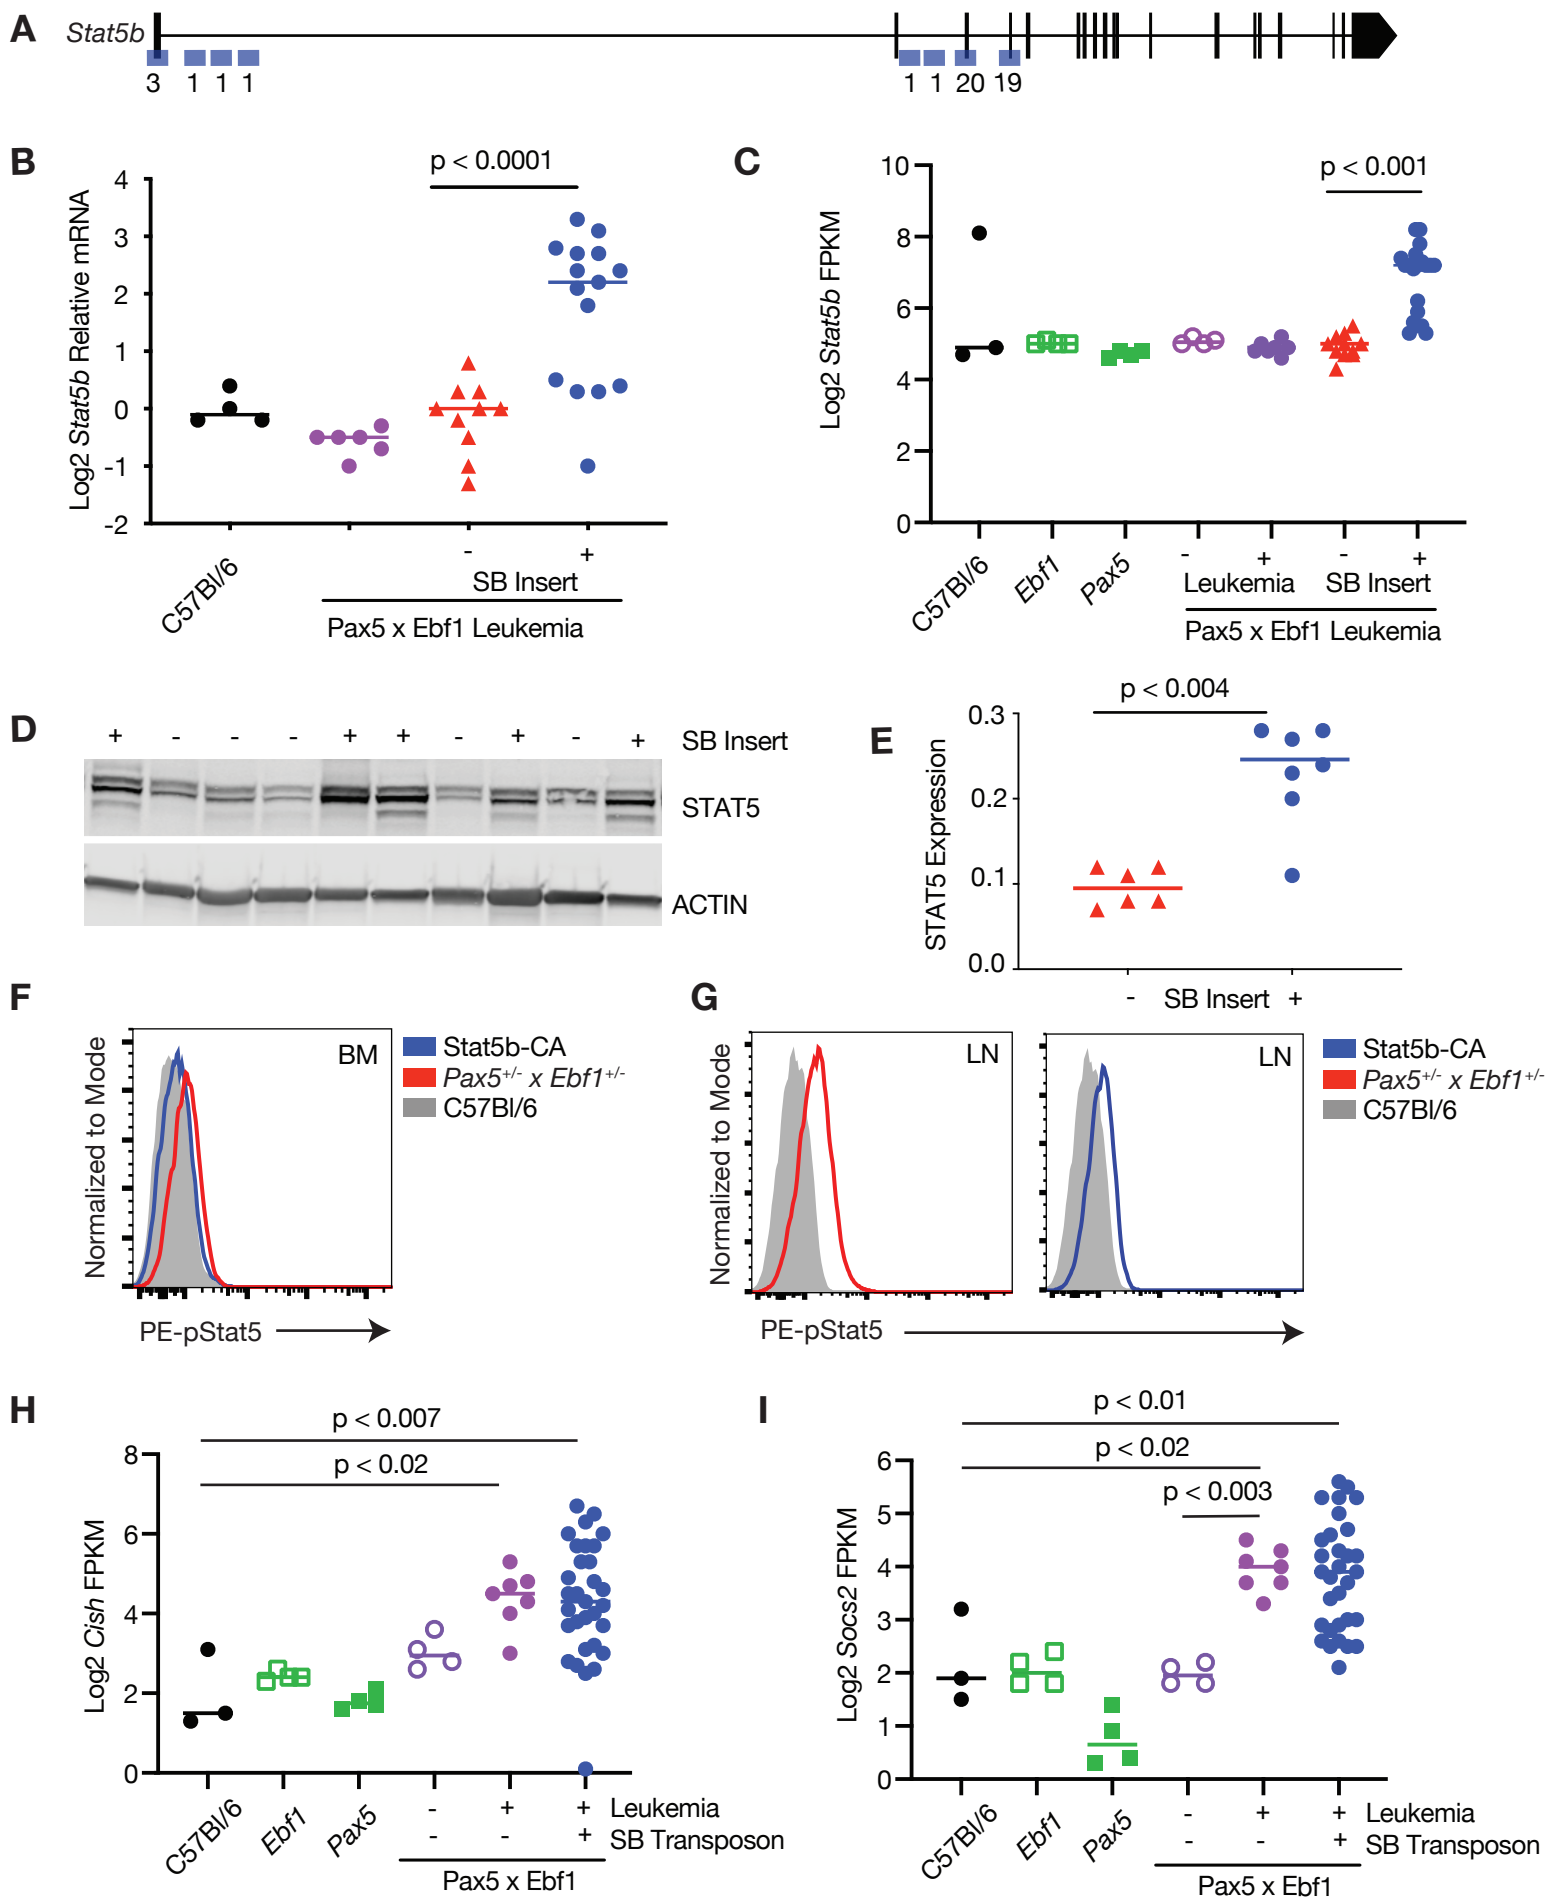



Figure 5

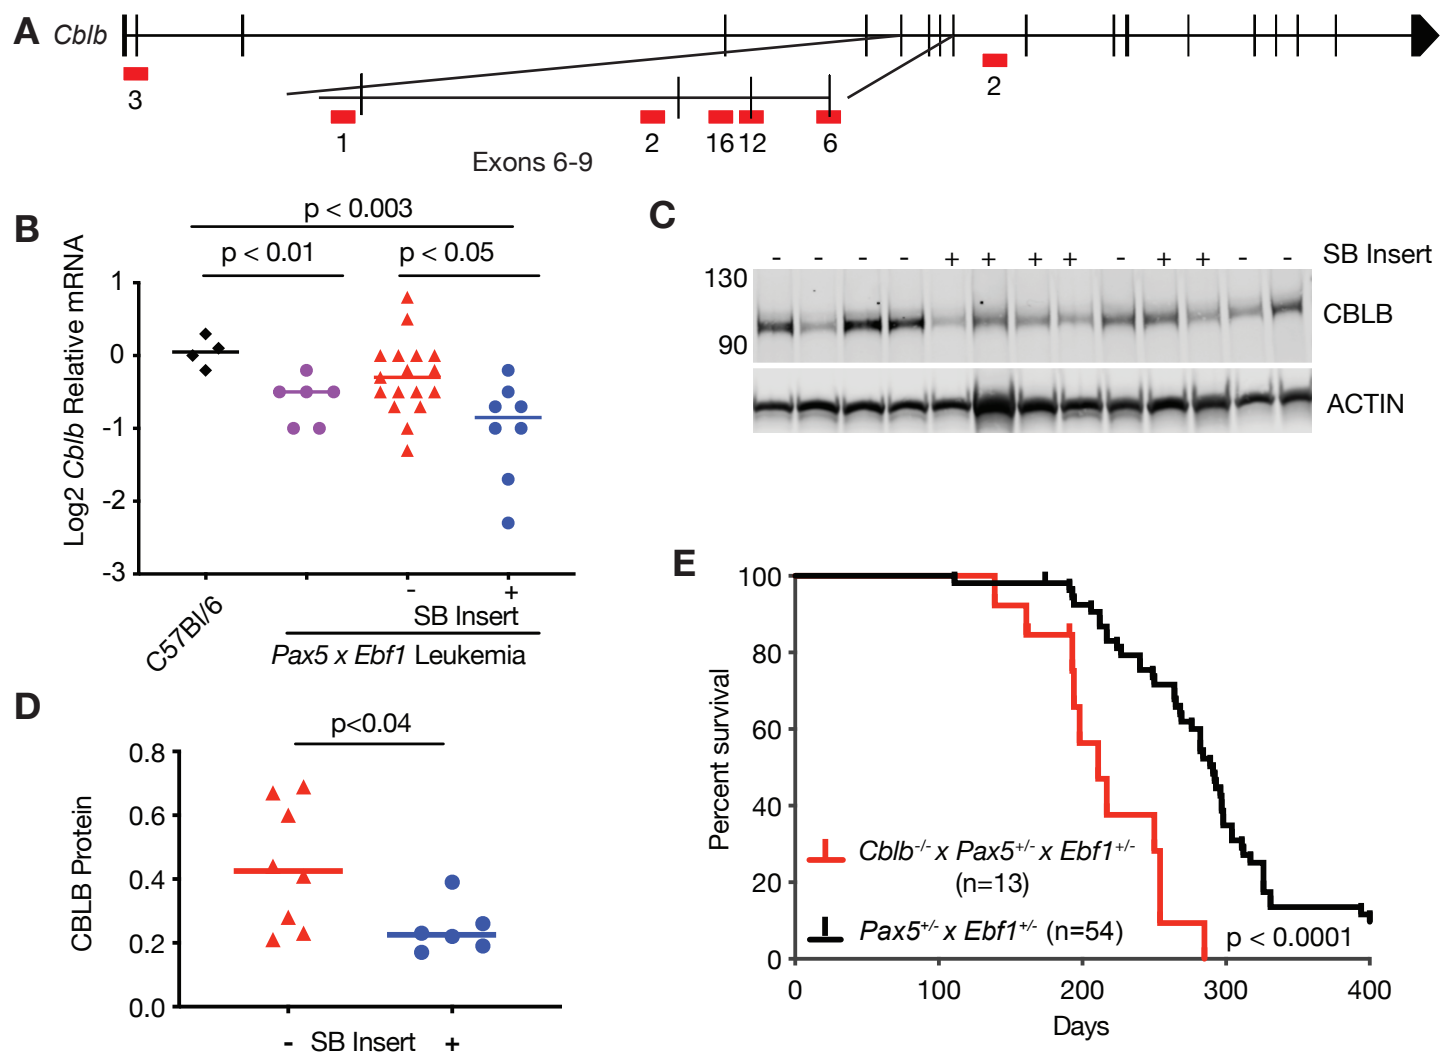

Figure 6

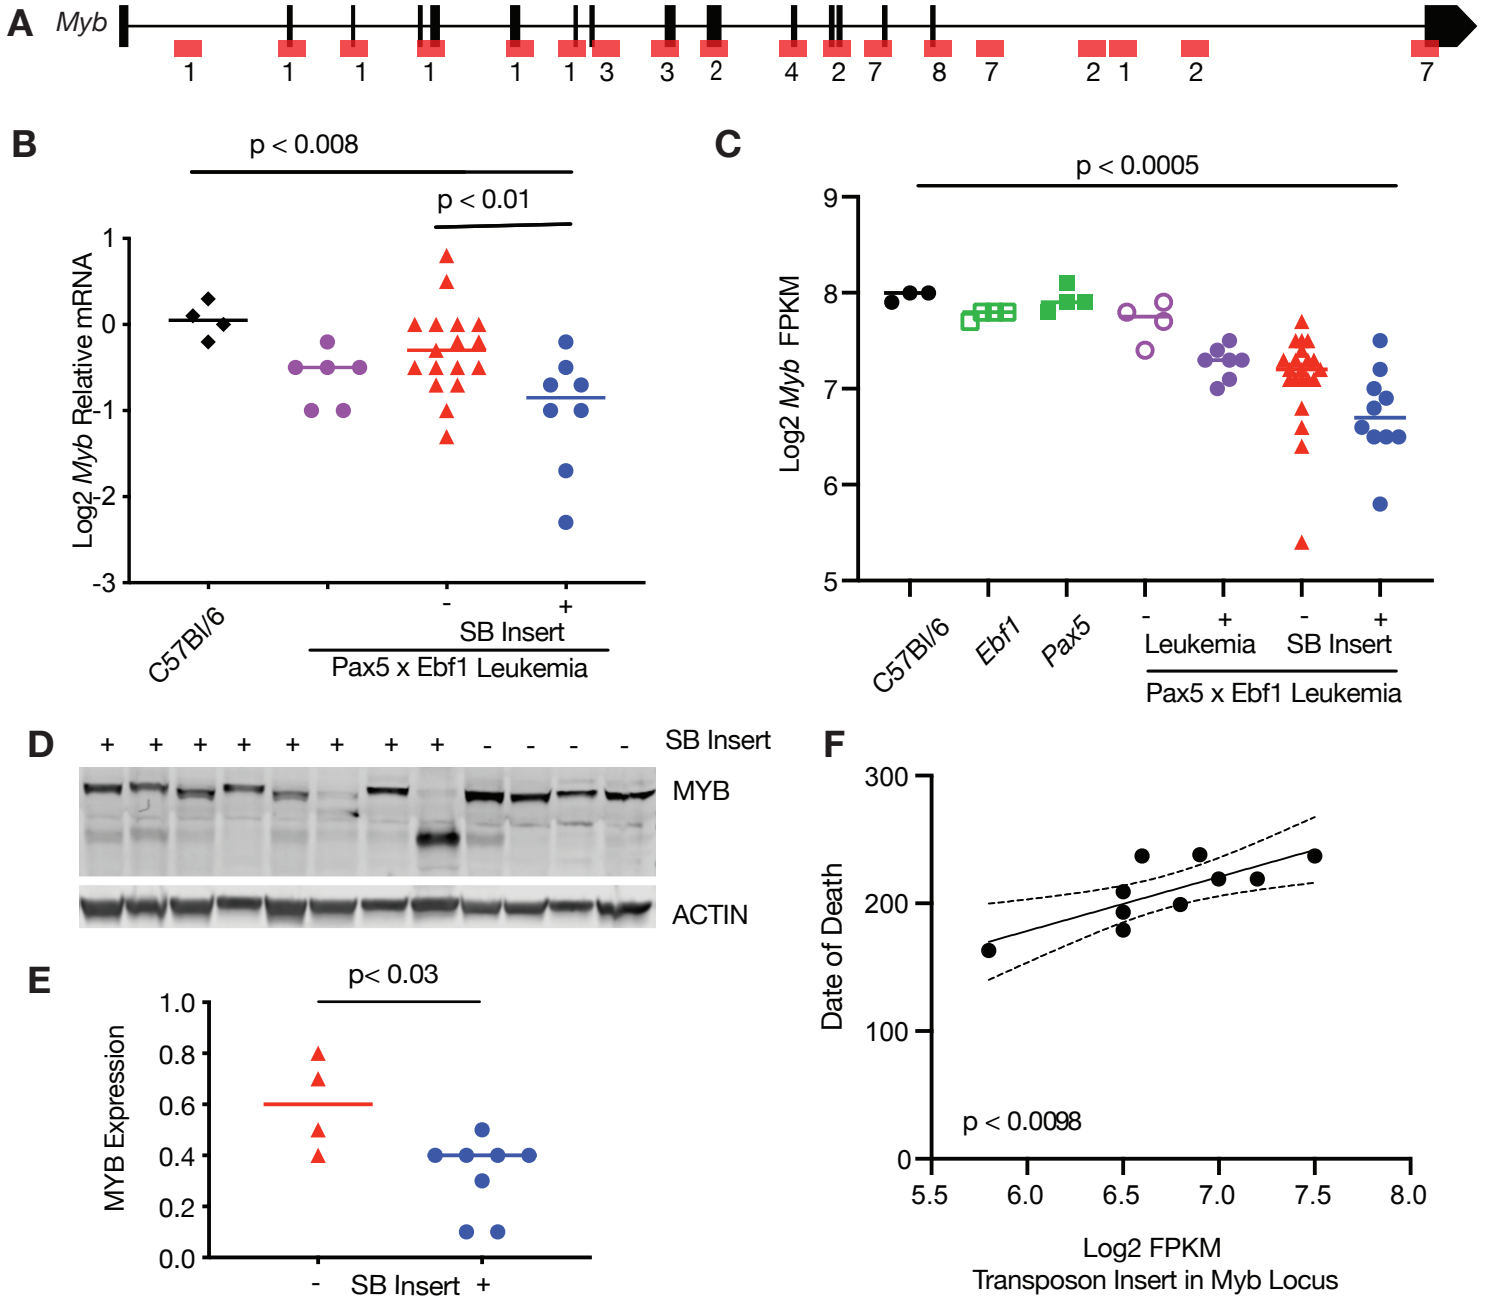

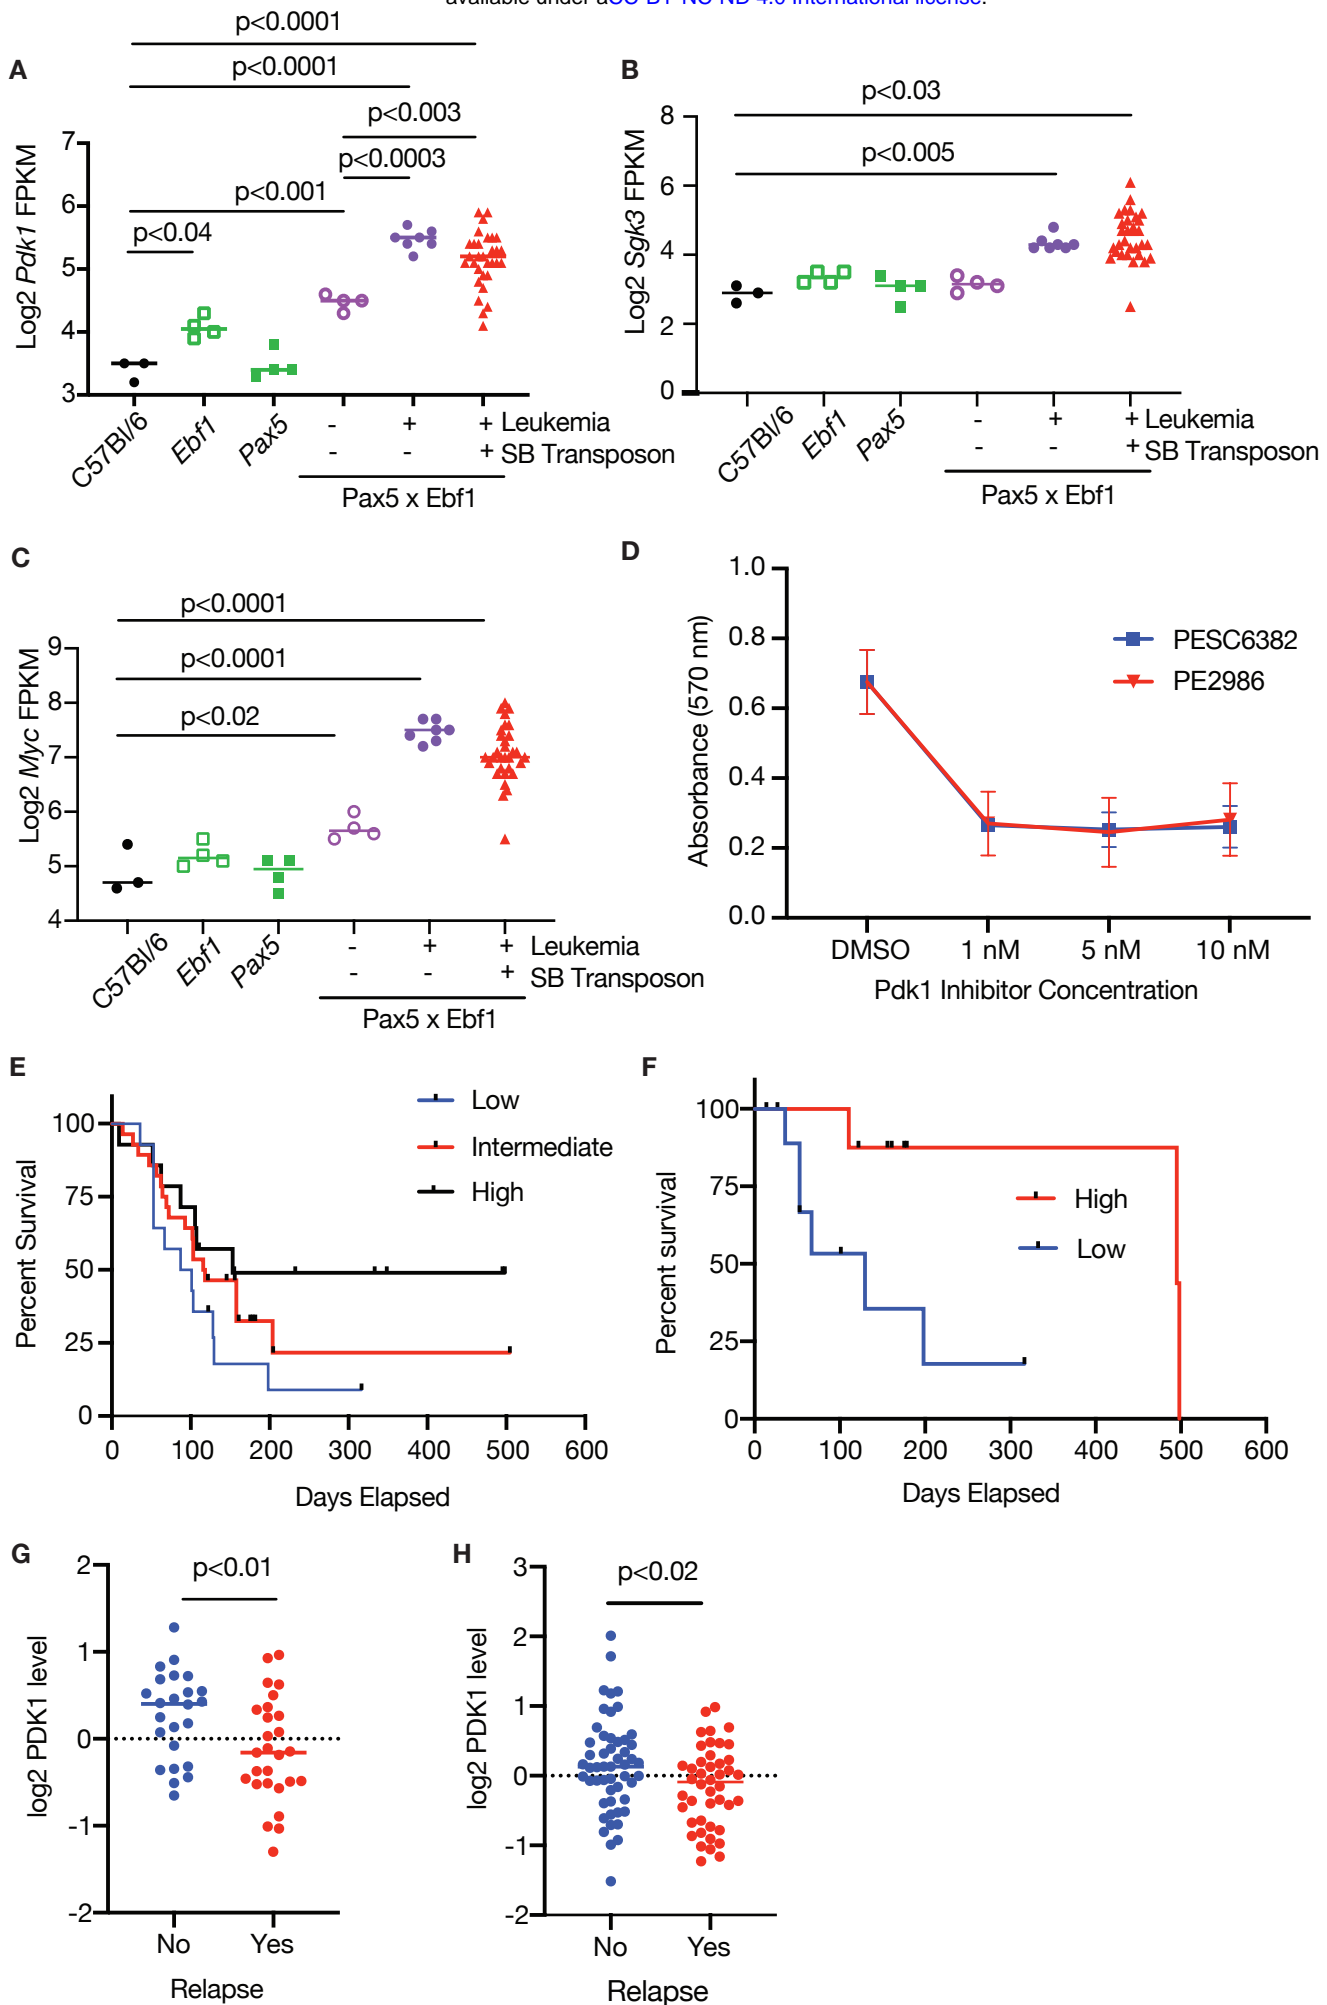

## Figure 8

**A**

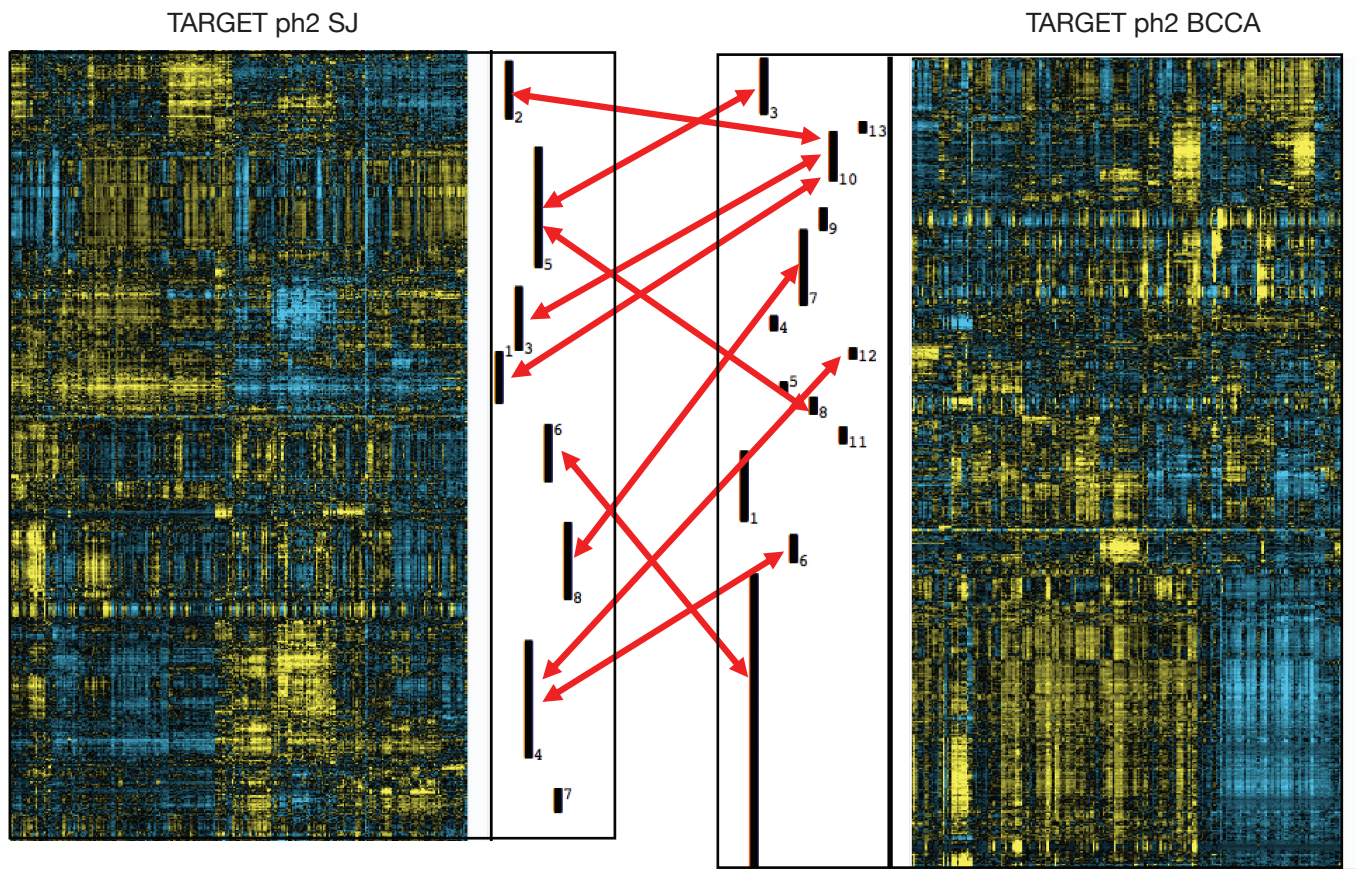

**B**

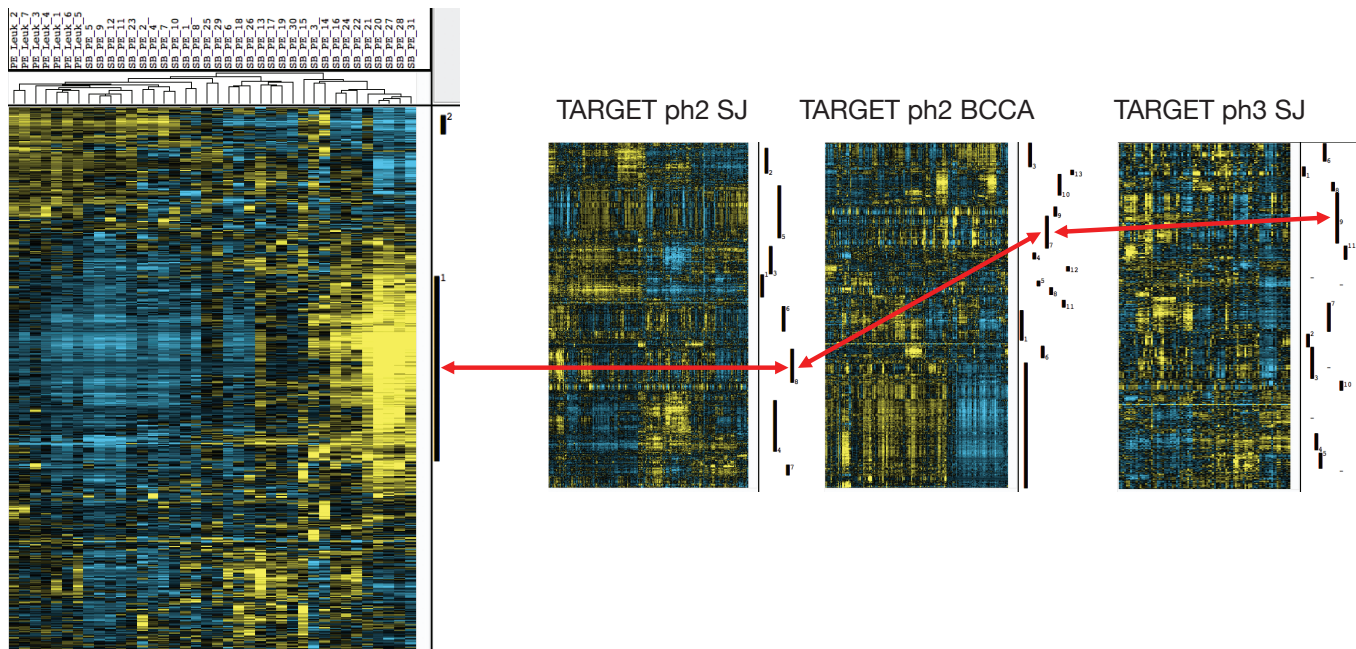

Source: https://www.biorxiv.org/content/10.1101/2020.11.25.398966v1.full.pdf
